# Supplementary material for: A computational study on H2S release and amide formation from thionoesters and cysteine
Source: Royal Society of Chemistry journal article supplement (doi:10.1039/c9ob00854c), 2019-01-01
Supplement: c9ob00854c1.pdf [file c9ob00854c1.pdf]

*Supporting Information*

**Computational Study on H<sub>2</sub>S Release and Amide Formation from  
Thionoesters and Cysteine**

Yuan-Ye Jiang<sup>\*a</sup>, Ling Zhu<sup>a</sup>, Xia Fan<sup>a</sup>, Qi Zhang<sup>b</sup>, Ya-Jie Fu<sup>a</sup>, He Li<sup>a</sup>, Bing Hu<sup>a</sup> and

Siwei Bi<sup>\*b</sup>

<sup>a</sup>School of Chemistry and Chemical Engineering, Qufu Normal University, Qufu 273165, People's Republic of China

<sup>b</sup>Institute of Industry & Equipment Technology, Hefei University of Technology, Hefei 230009, People's Republic of China

## Table of Contents

|                                                                                                      |     |
|------------------------------------------------------------------------------------------------------|-----|
| Formation of cyclic thiol intermediate from <b>4b</b> .....                                          | S3  |
| Relax energy surface scan of <b>8a</b> .....                                                         | S4  |
| Three-water-assisted nucleophilic addition transition state from <b>12</b> .....                     | S5  |
| Calculated Gibbs free energy profile for the H <sub>2</sub> S release from <b>8b</b> .....           | S6  |
| Detailed calculated energies .....                                                                   | S7  |
| Cartesian coordinates of all calculated species and imaginary frequencies of transition states ..... | S10 |

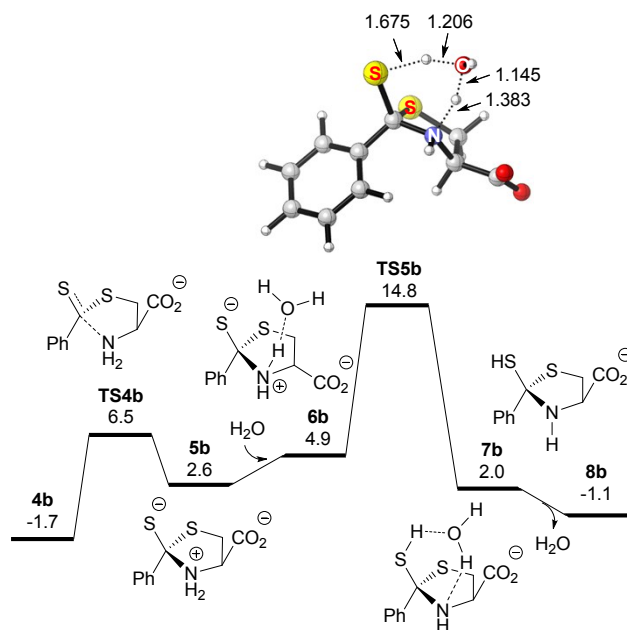

**Fig. S1** Calculated Gibbs free energy profile for the formation of cyclic thiol intermediate from **4b** (in kcal/mol). Bond lengths of **TS5b** are given in angstrom.

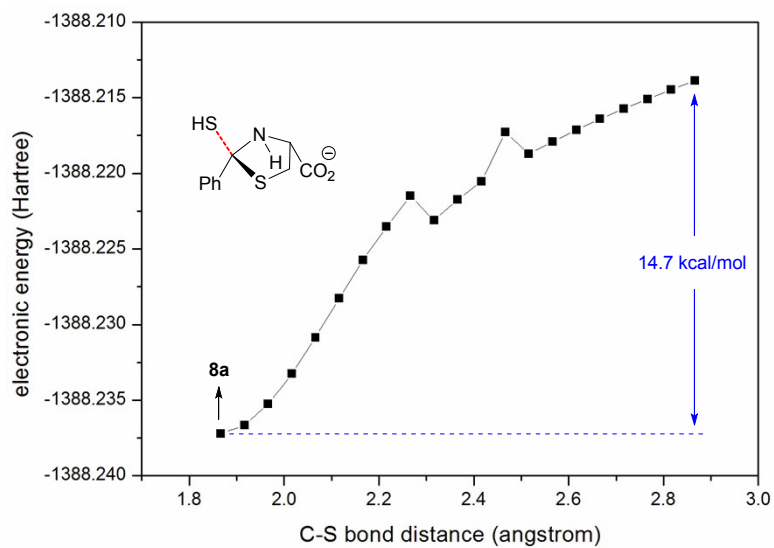

**Fig. S2** Relax energy surface scan of the C-S bond (red colored) of **8a**.

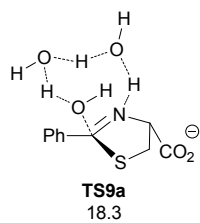

**Scheme S1** Three-water-assisted nucleophilic addition transition state from dihydrothiazole **12**.

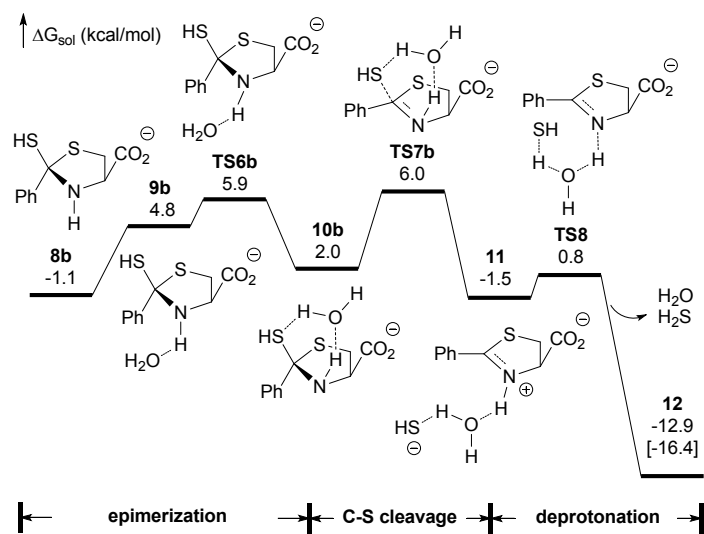

**Fig. S3** Calculated Gibbs free energy profile for the H<sub>2</sub>S release from **8b** (in kcal/mol).

**Table S1. Calculated thermodynamic corrections ( $\Delta G_{\text{cor}}$ ), solution-phase single point energies ( $E_{\text{sol}}$ ) and solution-phase Gibbs free energies referring to 1 M and 298.15 K ( $\Delta G_{\text{sol}}$ ) (in Hartree).**

|                  | $\Delta G_{\text{cor}}$ | $\Delta E_{\text{sol}}$ | $\Delta G_{\text{sol}}$ |
|------------------|-------------------------|-------------------------|-------------------------|
| H <sub>2</sub> O | 0.00332                 | -76.47629141            | -76.46994357            |
| <b>1</b>         | 0.151931                | -975.1131666            | -974.9582078            |
| <b>2a</b>        | 0.061669                | -721.6810565            | -721.6163597            |
| <b>2b</b>        | 0.065814                | -721.6763109            | -721.6074691            |
| <b>TS1a</b>      | 0.256141                | -1773.243637            | -1772.984468            |
| <b>3a</b>        | 0.261605                | -1773.276517            | -1773.011884            |
| <b>TS2a</b>      | 0.260888                | -1773.247457            | -1772.983541            |
| <b>TS1b</b>      | 0.241171                | -1696.792402            | -1696.548204            |
| <b>3b</b>        | 0.241932                | -1696.796405            | -1696.551445            |
| <b>TS2b</b>      | 0.242856                | -1696.791405            | -1696.545521            |
| PhOH             | 0.075748                | -307.6216982            | -307.5429224            |
| <b>4b</b>        | 0.141843                | -1389.179277            | -1389.034406            |
| <b>TS3</b>       | 0.142707                | -1389.168103            | -1389.022368            |
| <b>4a</b>        | 0.140716                | -1389.185561            | -1389.041817            |
| <b>TS4a</b>      | 0.144698                | -1389.166297            | -1389.018571            |
| <b>TS4b</b>      | 0.144424                | -1389.168782            | -1389.02133             |
| <b>5a</b>        | 0.146776                | -1389.175316            | -1389.025512            |
| <b>5b</b>        | 0.146765                | -1389.177283            | -1389.02749             |
| <b>6a</b>        | 0.168576                | -1465.662645            | -1465.491041            |
| <b>6b</b>        | 0.167232                | -1465.664109            | -1465.493849            |
| <b>TS5a</b>      | 0.161153                | -1465.642495            | -1465.478314            |
| <b>TS5b</b>      | 0.161027                | -1465.64198             | -1465.477925            |
| <b>7a</b>        | 0.163392                | -1465.670018            | -1465.503598            |
| <b>7b</b>        | 0.163593                | -1465.664943            | -1465.498322            |
| <b>8a</b>        | 0.141985                | -1389.185583            | -1389.04057             |
| <b>8b</b>        | 0.14299                 | -1389.179481            | -1389.033463            |
| <b>9a</b>        | 0.162163                | -1465.669449            | -1465.504258            |
| <b>TS6a</b>      | 0.162066                | -1465.660863            | -1465.49577             |
| <b>10a</b>       | 0.163556                | -1465.668551            | -1465.501967            |
| <b>TS7a</b>      | 0.16298                 | -1465.66146             | -1465.495452            |
| <b>11</b>        | 0.161826                | -1465.668839            | -1465.503985            |
| <b>TS8</b>       | 0.154556                | -1465.657894            | -1465.50031             |
| <b>12</b>        | 0.122777                | -989.7522022            | -989.6263973            |
| <b>TS9</b>       | 0.164872                | -1142.681458            | -1142.513558            |
| <b>TS9a</b>      | 0.186898                | -1219.171721            | -1218.981795            |
| <b>13</b>        | 0.168912                | -1142.705548            | -1142.533608            |
| <b>14</b>        | 0.169882                | -1142.705154            | -1142.532244            |

|                 |           |              |              |
|-----------------|-----------|--------------|--------------|
| <b>TS10</b>     | 0.169533  | -1142.700033 | -1142.527472 |
| <b>15a</b>      | 0.142693  | -1066.248356 | -1066.102635 |
| OH <sup>-</sup> | -0.007961 | -75.97343399 | -75.97836715 |
| <b>TS11</b>     | 0.130753  | -1065.701495 | -1065.567714 |
| <b>16</b>       | 0.132916  | -1065.742313 | -1065.606369 |
| <b>17</b>       | 0.13339   | -1065.759228 | -1065.62281  |
| <b>TS12</b>     | 0.237015  | -1696.784247 | -1696.544204 |
| <b>18</b>       | 0.240194  | -1696.791488 | -1696.548266 |
| <b>TS13</b>     | 0.239285  | -1696.780015 | -1696.537702 |
| <b>19</b>       | 0.237794  | -1696.782084 | -1696.541263 |
| <b>TS14</b>     | 0.237627  | -1696.781347 | -1696.540692 |
| <b>20a</b>      | 0.141553  | -1389.203163 | -1389.058583 |
| <b>TS15</b>     | 0.254423  | -1773.257655 | -1773.000204 |
| <b>21</b>       | 0.258016  | -1773.279139 | -1773.018095 |
| <b>TS16</b>     | 0.258164  | -1773.270726 | -1773.009534 |
| <b>TS17</b>     | 0.139358  | -1389.162155 | -1389.019769 |
| <b>20b</b>      | 0.139754  | -1389.196062 | -1389.053281 |
| <b>TS18a</b>    | 0.183967  | -1542.099131 | -1541.912137 |
| <b>22a</b>      | 0.18719   | -1542.141523 | -1541.951305 |
| <b>TS19a</b>    | 0.182732  | -1542.132474 | -1541.946714 |
| <b>TS20a</b>    | 0.149876  | -1465.157485 | -1465.004582 |
| <b>23a</b>      | 0.153233  | -1465.16972  | -1465.013459 |
| <b>TS21a</b>    | 0.171829  | -1541.644424 | -1541.469567 |
| HS <sup>-</sup> | -0.011991 | -398.9506975 | -398.9596606 |
| <b>TS18b</b>    | 0.183957  | -1542.103391 | -1541.916406 |
| <b>22b</b>      | 0.184554  | -1542.135317 | -1541.947735 |
| <b>TS19b</b>    | 0.183265  | -1542.126292 | -1541.939999 |
| <b>15b</b>      | 0.143504  | -1066.243112 | -1066.09658  |
| <b>TS20b</b>    | 0.151573  | -1465.152644 | -1464.998043 |
| <b>23b</b>      | 0.151332  | -1465.171396 | -1465.017036 |
| <b>TS21b</b>    | 0.171816  | -1541.644589 | -1541.469746 |
| <b>TS22a</b>    | 0.163938  | -1465.647283 | -1465.480317 |
| <b>TS22b</b>    | 0.160881  | -1465.64591  | -1465.482001 |
| <b>24b</b>      | 0.142523  | -1389.182002 | -1389.036451 |
| <b>25a</b>      | 0.130875  | -1388.711901 | -1388.577998 |
| <b>TS23a</b>    | 0.131516  | -1388.694427 | -1388.559883 |
| <b>26a</b>      | 0.131993  | -1388.69639  | -1388.561369 |
| <b>TS24</b>     | 0.130307  | -1388.670169 | -1388.536834 |
| <b>25b</b>      | 0.131428  | -1388.708214 | -1388.573758 |
| <b>TS23b</b>    | 0.132789  | -1388.700892 | -1388.565075 |



|            |          |              |              |
|------------|----------|--------------|--------------|
| <b>26b</b> | 0.132478 | -1388.702899 | -1388.567393 |
|------------|----------|--------------|--------------|

**Cartesian coordinates of all calculated intermediates and transition states (in angstrom) and imaginary frequency of transition states.**

**H<sub>2</sub>O**

|   |            |             |             |
|---|------------|-------------|-------------|
| O | 0.00000000 | 0.00000000  | 0.12157700  |
| H | 0.00000000 | 0.75457500  | -0.48630700 |
| H | 0.00000000 | -0.75457500 | -0.48630700 |

**1**

|   |             |             |             |
|---|-------------|-------------|-------------|
| C | -0.43116300 | 0.46234600  | -0.00604300 |
| S | 0.12106700  | 2.01380700  | -0.08871900 |
| C | -1.85210500 | 0.05035500  | 0.00451800  |
| C | -2.20364700 | -1.31462100 | -0.00724500 |
| C | -2.87481700 | 1.01796600  | 0.02315600  |
| C | -3.54493500 | -1.69610000 | -0.00319300 |
| H | -1.42294900 | -2.07418300 | -0.02398100 |
| C | -4.21274600 | 0.63197100  | 0.02944900  |
| H | -2.60116500 | 2.07372500  | 0.03367300  |
| C | -4.55226400 | -0.72608800 | 0.01509300  |
| H | -3.80529300 | -2.75670000 | -0.01566200 |
| H | -4.99611600 | 1.39276400  | 0.04591000  |
| H | -5.60218400 | -1.02786000 | 0.01859000  |
| O | 0.38323600  | -0.61111600 | 0.05692400  |
| C | 1.77198600  | -0.46196800 | 0.03410200  |
| C | 2.43264900  | -0.48934400 | -1.19197500 |
| C | 2.45879600  | -0.35699400 | 1.24123300  |
| C | 3.82764000  | -0.40669700 | -1.20488400 |
| H | 1.85580100  | -0.57178400 | -2.11464000 |
| C | 3.85375800  | -0.27512900 | 1.21485800  |
| H | 1.90212500  | -0.33992600 | 2.17961000  |
| C | 4.53871300  | -0.29780300 | -0.00482400 |
| H | 4.36025600  | -0.42759100 | -2.15828200 |
| H | 4.40649300  | -0.19402400 | 2.15347100  |
| H | 5.62889200  | -0.23376900 | -0.02004800 |

**2a**

|   |            |             |             |
|---|------------|-------------|-------------|
| C | 0.78402800 | -0.65660000 | 0.31690100  |
| H | 0.66514200 | -1.68159200 | -0.05764000 |
| H | 0.65442500 | -0.67592800 | 1.41005900  |

|   |             |             |             |
|---|-------------|-------------|-------------|
| C | -0.25593200 | 0.25817300  | -0.32240500 |
| H | -0.13267100 | 0.17314400  | -1.42254500 |
| C | -1.69403000 | -0.26798300 | -0.04959800 |
| O | -1.85796900 | -1.51529400 | -0.06263100 |
| O | -2.59466300 | 0.59594200  | 0.11812000  |
| N | -0.11679000 | 1.63536200  | 0.14456400  |
| H | 0.49292300  | 2.15193100  | -0.48882000 |
| H | -1.04740900 | 2.04972500  | 0.06371200  |
| S | 2.52119600  | -0.19698100 | -0.06921100 |
| H | 2.46265200  | 1.04015000  | 0.47735400  |

**2b**

|   |             |             |             |
|---|-------------|-------------|-------------|
| C | 0.74890000  | -0.81721000 | 0.28760900  |
| H | 0.62336500  | -1.85489600 | -0.05990300 |
| H | 0.43117000  | -0.79992600 | 1.34729300  |
| C | -0.24959000 | 0.05052400  | -0.52087400 |
| H | -0.17414600 | -0.20089200 | -1.58623200 |
| C | -1.68697800 | -0.15338600 | -0.00793400 |
| O | -2.25160700 | -1.21739800 | -0.35431200 |
| O | -2.13821300 | 0.73583000  | 0.76429200  |
| N | 0.15394500  | 1.46675500  | -0.34953600 |
| H | -0.38762900 | 1.83165900  | 0.45078100  |
| S | 2.46849000  | -0.20658900 | 0.11166500  |
| H | 1.22056600  | 1.38841100  | -0.15500300 |
| H | -0.04221300 | 2.04676400  | -1.16946600 |

**TS1a**

imaginary frequency = -915.09 cm<sup>-1</sup>

|   |             |            |             |
|---|-------------|------------|-------------|
| C | 0.63866100  | 0.95408400 | 0.38090500  |
| S | 0.56644600  | 0.25757600 | 1.98874000  |
| C | -0.16744100 | 2.20310700 | 0.11501400  |
| C | 0.16644600  | 3.05158800 | -0.95539700 |
| C | -1.28553600 | 2.51826100 | 0.90223100  |
| C | -0.59581500 | 4.19005900 | -1.22180100 |
| H | 1.02365600  | 2.81361100 | -1.58442000 |
| C | -2.05170100 | 3.65369600 | 0.62889500  |
| H | -1.54076200 | 1.86661400 | 1.73775700  |
| C | -1.70992800 | 4.49595600 | -0.43260100 |
| H | -0.31967100 | 4.84188800 | -2.05423300 |
| H | -2.91813200 | 3.88154500 | 1.25434300  |
| H | -2.30746100 | 5.38583100 | -0.64433900 |

|   |             |             |             |   |             |             |             |
|---|-------------|-------------|-------------|---|-------------|-------------|-------------|
| O | 1.89085100  | 1.11216800  | -0.22750500 | H | -3.94170500 | 2.81956400  | 1.09403900  |
| C | 2.83982900  | 0.10359200  | -0.19410800 | H | -3.44416700 | 4.84390500  | -0.28415400 |
| C | 3.65179600  | -0.07357900 | 0.93002300  | O | 1.50249900  | 1.47505800  | -0.09566800 |
| C | 3.01007900  | -0.68639500 | -1.33386000 | C | 2.66363700  | 0.71595100  | -0.03279600 |
| C | 4.62652200  | -1.07450200 | 0.91493300  | C | 3.33621700  | 0.59174000  | 1.18633000  |
| H | 3.51044000  | 0.56771900  | 1.79839800  | C | 3.18290800  | 0.14472800  | -1.19812400 |
| C | 3.98765400  | -1.68570300 | -1.33834900 | C | 4.51993700  | -0.14830000 | 1.24334300  |
| H | 2.37942800  | -0.51199000 | -2.20692200 | H | 2.92423800  | 1.06996200  | 2.07447600  |
| C | 4.79220900  | -1.88650700 | -0.21278900 | C | 4.36752600  | -0.59335800 | -1.13052700 |
| H | 5.26239000  | -1.21879200 | 1.79159300  | H | 2.66250000  | 0.28471400  | -2.14607600 |
| H | 4.12032600  | -2.30640500 | -2.22742000 | C | 5.03243000  | -0.75021400 | 0.08969900  |
| H | 5.55454000  | -2.66886700 | -0.21661700 | H | 5.04378500  | -0.25257900 | 2.19632500  |
| C | -1.90738400 | -0.62895400 | -0.18926400 | H | 4.77214000  | -1.04572500 | -2.03876800 |
| H | -1.68662500 | -0.54600400 | 0.88462400  | H | 5.95591700  | -1.33142100 | 0.13906300  |
| H | -2.56459100 | 0.19785700  | -0.49369300 | C | -1.70976600 | -0.96302900 | -1.05079800 |
| C | -2.56675200 | -1.96954700 | -0.48432200 | H | -2.29629600 | -0.17652200 | -0.56481300 |
| H | -1.86539300 | -2.76514300 | -0.14869100 | H | -2.11674800 | -1.10538700 | -2.06343900 |
| C | -3.81751200 | -2.17920700 | 0.41613300  | C | -1.81112300 | -2.27400300 | -0.27763300 |
| O | -4.72620000 | -2.91329700 | -0.05147000 | H | -1.18554900 | -2.17438300 | 0.62961400  |
| O | -3.80641800 | -1.65049600 | 1.55747300  | C | -3.24368700 | -2.45444600 | 0.29717700  |
| N | -2.93019300 | -2.10174800 | -1.89196100 | O | -3.79218800 | -1.43089000 | 0.78776600  |
| H | -2.11180600 | -2.38997800 | -2.42961500 | O | -3.72720200 | -3.61476100 | 0.28679200  |
| H | -3.59863000 | -2.87242200 | -1.93956000 | N | -1.42668200 | -3.41529100 | -1.10595900 |
| S | -0.30387100 | -0.41620700 | -1.04291500 | H | -0.41366000 | -3.53309800 | -1.07378100 |
| H | 0.94352800  | -1.63941600 | 1.31166700  | H | -1.82991200 | -4.24042900 | -0.65904700 |
| O | 0.91036000  | -2.37890800 | 0.60613300  | S | -0.01838100 | -0.31352100 | -1.32724400 |
| H | 0.40197400  | -1.66657000 | -0.25797200 | H | 0.91564800  | -1.01224200 | 1.42674100  |
| H | 0.21143100  | -2.99058100 | 0.90471800  | O | 1.73570800  | -2.60352300 | 0.30718700  |
|   |             |             |             | H | 1.31049600  | -2.03417300 | -0.36516800 |
|   |             |             |             | H | 1.00814000  | -3.16758500 | 0.61160700  |

### 3a

|   |             |            |             |
|---|-------------|------------|-------------|
| C | 0.23675200  | 0.87673600 | 0.11934300  |
| S | 0.12011400  | 0.03586500 | 1.76441000  |
| C | -0.79539300 | 1.98990100 | 0.05235000  |
| C | -0.52698100 | 3.12550600 | -0.73016200 |
| C | -2.03572700 | 1.89288900 | 0.70259400  |
| C | -1.47255000 | 4.14459300 | -0.84600400 |
| H | 0.42649100  | 3.20824800 | -1.25049000 |
| C | -2.98215200 | 2.91548400 | 0.58100500  |
| H | -2.27977100 | 1.01215900 | 1.29702600  |
| C | -2.70503600 | 4.04486300 | -0.19086900 |
| H | -1.24499100 | 5.02320000 | -1.45428500 |

### TS2a

imaginary frequency = -456.12 cm<sup>-1</sup>

|   |            |             |             |
|---|------------|-------------|-------------|
| C | 1.18583200 | -0.16068700 | -0.45115100 |
| S | 0.92724400 | 0.18430600  | -2.17123900 |
| C | 2.59298600 | -0.47434200 | 0.02263200  |
| C | 2.88140300 | -0.49176200 | 1.39993700  |
| C | 3.61736500 | -0.77837200 | -0.88418700 |
| C | 4.16186700 | -0.81037000 | 1.85334600  |
| H | 2.09909300 | -0.24093300 | 2.11675100  |
| C | 4.90138900 | -1.09358600 | -0.42910700 |

|   |             |             |             |   |             |             |             |
|---|-------------|-------------|-------------|---|-------------|-------------|-------------|
| H | 3.39110500  | -0.76729300 | -1.95102100 | C | -4.70248500 | 0.73600000  | -1.00024800 |
| C | 5.17854600  | -1.11226000 | 0.94000300  | H | -2.84595300 | 1.83090000  | -0.93703800 |
| H | 4.36885800  | -0.81675900 | 2.92618800  | C | -4.75004800 | -1.34231700 | 0.22569100  |
| H | 5.68727500  | -1.32720400 | -1.15142900 | H | -2.92340500 | -1.85794500 | 1.26817600  |
| H | 6.18183000  | -1.35831800 | 1.29592400  | C | -5.39621400 | -0.40533400 | -0.59103800 |
| O | 0.98992200  | 1.34087800  | 0.40861400  | H | -5.19420500 | 1.47759600  | -1.63509300 |
| C | -0.29263200 | 1.75920900  | 0.60567700  | H | -5.28037600 | -2.24003800 | 0.55369500  |
| C | -0.95195300 | 2.54023800  | -0.35824600 | H | -6.43116500 | -0.56515700 | -0.90290900 |
| C | -0.95915100 | 1.39354700  | 1.78488500  | O | -0.91241900 | 1.50748000  | 0.29633400  |
| C | -2.27592400 | 2.93033500  | -0.14676000 | C | 0.39887300  | 1.92317100  | 0.25680500  |
| H | -0.42175800 | 2.82493600  | -1.26675400 | C | 1.18010200  | 2.06042200  | 1.41006900  |
| C | -2.28321000 | 1.78995000  | 1.98706200  | C | 0.90996100  | 2.28494100  | -0.99459100 |
| H | -0.42987500 | 0.79761100  | 2.52848900  | C | 2.49497900  | 2.52248700  | 1.29269900  |
| C | -2.94901700 | 2.54814400  | 1.01890900  | H | 0.75862100  | 1.79622900  | 2.37683500  |
| H | -2.78812900 | 3.53177600  | -0.90182200 | C | 2.21810300  | 2.76549900  | -1.09818900 |
| H | -2.80007300 | 1.49694400  | 2.90418700  | H | 0.27474100  | 2.17600400  | -1.87375900 |
| H | -3.98884100 | 2.84399400  | 1.17411100  | C | 3.02116400  | 2.86941000  | 0.04381700  |
| C | -1.51200900 | -1.12338800 | -0.57548500 | H | 3.11032300  | 2.61925200  | 2.19042800  |
| H | -1.62469900 | -0.06185200 | -0.81079300 | H | 2.61363000  | 3.04916000  | -2.07645400 |
| H | -1.48214600 | -1.68528500 | -1.52192900 | H | 4.04792900  | 3.23295300  | -0.03787200 |
| C | -2.66695500 | -1.60421400 | 0.29594800  | C | 0.90692700  | -1.89367900 | -0.39743100 |
| H | -2.67014700 | -0.99838900 | 1.21673500  | H | 0.55275800  | -2.07585900 | 0.63565700  |
| C | -4.00022200 | -1.28629000 | -0.44054300 | H | 1.07870300  | -2.86937000 | -0.88180600 |
| O | -4.23246500 | -0.06964100 | -0.68049900 | C | 2.23417500  | -1.12266800 | -0.27727400 |
| O | -4.74062100 | -2.25519100 | -0.74637200 | H | 2.12422900  | -0.33030700 | 0.47129500  |
| N | -2.48360300 | -3.00641600 | 0.66351100  | C | 3.37797900  | -2.08290700 | 0.10977100  |
| H | -3.27631600 | -3.26967300 | 1.25306500  | O | 4.17505900  | -2.39933300 | -0.81447000 |
| H | -2.64080800 | -3.55142300 | -0.18926800 | O | 3.37012700  | -2.50096100 | 1.28913800  |
| S | 0.08052700  | -1.36781100 | 0.30165100  | N | 2.56514800  | -0.48797900 | -1.57911900 |
| H | 1.94220000  | 1.68722600  | -1.91396800 | H | 1.66590300  | -0.31342200 | -2.08002700 |
| O | 2.33767600  | 2.51048600  | -1.30481000 | H | 3.05860000  | 0.40313100  | -1.46027300 |
| H | 3.28156400  | 2.31199500  | -1.15600500 | S | -0.38959600 | -1.00500600 | -1.28901100 |
| H | 1.82576100  | 2.19446300  | -0.43660900 | H | 3.18709700  | -1.15200200 | -2.07360600 |

### TS1b

imaginary frequency = -78.71 cm<sup>-1</sup>

|   |             |             |             |
|---|-------------|-------------|-------------|
| C | -1.29435600 | 0.20779000  | 0.64249100  |
| S | -0.68747200 | -0.53356300 | 2.04965800  |
| C | -2.72118800 | 0.00608000  | 0.21745200  |
| C | -3.37683300 | 0.94001100  | -0.60403400 |
| C | -3.43155700 | -1.13651500 | 0.62704600  |

### 3b

|   |             |             |             |
|---|-------------|-------------|-------------|
| C | -1.17876000 | -0.00511800 | 0.46312800  |
| S | -0.64851100 | -0.88109500 | 1.91087100  |
| C | -2.67477500 | -0.08066400 | 0.14356900  |
| C | -3.30632600 | 0.92441300  | -0.60774100 |
| C | -3.43406800 | -1.19249600 | 0.53901900  |
| C | -4.66014900 | 0.82104500  | -0.94671100 |

|   |             |             |             |   |             |             |             |
|---|-------------|-------------|-------------|---|-------------|-------------|-------------|
| H | -2.73595900 | 1.79489400  | -0.93028900 | H | 0.38886500  | -1.21659500 | -1.80413600 |
| C | -4.78313500 | -1.29904300 | 0.19785400  | C | 3.48281600  | -1.88885800 | 0.43771700  |
| H | -2.93748000 | -1.96446100 | 1.12888200  | H | 2.24535500  | -1.21518200 | 2.07381900  |
| C | -5.40595400 | -0.29064800 | -0.54724100 | C | 3.55916200  | -2.13275000 | -0.93806700 |
| H | -5.13234600 | 1.61750600  | -1.52784600 | H | 2.48225500  | -2.08867500 | -2.81241500 |
| H | -5.35394100 | -2.17459400 | 0.51833600  | H | 4.35033300  | -2.07146100 | 1.07687800  |
| H | -6.46320000 | -0.37146800 | -0.81168800 | H | 4.48679900  | -2.50161600 | -1.38228400 |
| O | -0.89251000 | 1.42235500  | 0.46116900  | O | -0.90265400 | 0.15838800  | -0.46325300 |
| C | 0.38801100  | 1.90071500  | 0.40263900  | C | -2.24274100 | 0.03451900  | -0.51904300 |
| C | 1.26563400  | 1.81704600  | 1.49345600  | C | -2.82563800 | -1.06809200 | -1.17075500 |
| C | 0.78959100  | 2.55821200  | -0.76971100 | C | -3.08101800 | 1.00312700  | 0.06444300  |
| C | 2.54974100  | 2.36187000  | 1.38955900  | C | -4.21441800 | -1.17574700 | -1.27083500 |
| H | 0.92784100  | 1.31099000  | 2.39563900  | H | -2.17075200 | -1.82649400 | -1.60180100 |
| C | 2.06681000  | 3.11785000  | -0.85834400 | C | -4.46958400 | 0.88930300  | -0.03911000 |
| H | 0.08974400  | 2.61862200  | -1.60446800 | H | -2.63375400 | 1.84275800  | 0.59979400  |
| C | 2.95828200  | 3.00849300  | 0.21640200  | C | -5.04342000 | -0.19793700 | -0.70832000 |
| H | 3.23532000  | 2.28651900  | 2.23717100  | H | -4.65426400 | -2.03131000 | -1.79029100 |
| H | 2.37237100  | 3.62731200  | -1.77527300 | H | -5.10883200 | 1.65496400  | 0.40850500  |
| H | 3.96138100  | 3.43461800  | 0.14415800  | H | -6.12963900 | -0.28319600 | -0.78996300 |
| C | 0.89993900  | -1.83086500 | -0.66541700 | C | 1.47866000  | 1.78472500  | 1.51308100  |
| H | 0.51354300  | -2.38707600 | 0.20228800  | H | 1.46863800  | 2.54781400  | 2.30636000  |
| H | 1.07057400  | -2.52130600 | -1.50681000 | H | 2.44191400  | 1.26275900  | 1.57706200  |
| C | 2.21139300  | -1.17200400 | -0.23038800 | C | 1.41356700  | 2.45900200  | 0.13775300  |
| H | 2.04854500  | -0.67820800 | 0.73425500  | H | 1.86264600  | 3.45928600  | 0.23901600  |
| C | 3.32526700  | -2.24177200 | -0.12151400 | C | 2.23652700  | 1.76700500  | -0.98881300 |
| O | 4.21707200  | -2.19688100 | -1.01190300 | O | 3.36987600  | 1.34922800  | -0.66758300 |
| O | 3.20770200  | -3.07207700 | 0.80423300  | O | 1.70876000  | 1.76278000  | -2.12942600 |
| N | 2.65889900  | -0.15484900 | -1.21976300 | N | 0.02601600  | 2.64787200  | -0.34853000 |
| H | 1.85923700  | 0.20810900  | -1.76371700 | H | -0.52531400 | 3.27788800  | 0.24292800  |
| H | 3.11687400  | 0.64647000  | -0.76654900 | H | 0.07410000  | 3.00294700  | -1.31137400 |
| S | -0.40639000 | -0.70213800 | -1.22017100 | S | 0.11509100  | 0.67986100  | 2.07410600  |
| H | 3.36650800  | -0.64164300 | -1.80629700 | H | -0.44435200 | 1.68803400  | -0.40019900 |

## TS2b

imaginary frequency =  $-376.76 \text{ cm}^{-1}$

|   |             |             |             |
|---|-------------|-------------|-------------|
| C | -0.09760000 | -0.68480900 | 0.87124800  |
| S | -1.10799300 | -1.91111200 | 1.53886100  |
| C | 1.17293900  | -1.14932000 | 0.20110700  |
| C | 1.25238400  | -1.41701700 | -1.17374800 |
| C | 2.30192600  | -1.40583100 | 1.00039100  |
| C | 2.43684700  | -1.90068200 | -1.73664400 |

## PhOH

|   |             |             |             |
|---|-------------|-------------|-------------|
| C | -1.18070000 | -1.18877200 | -0.00008800 |
| C | 0.21474300  | -1.22799700 | 0.00024700  |
| C | 0.94515600  | -0.03028800 | 0.00031200  |
| C | 0.27123200  | 1.19969200  | 0.00008100  |
| C | -1.12601900 | 1.22512800  | 0.00001900  |
| C | -1.86084800 | 0.03493400  | -0.00012000 |
| H | -1.74205400 | -2.12654800 | -0.00012900 |

|   |             |             |             |
|---|-------------|-------------|-------------|
| H | 0.75552200  | -2.17689100 | 0.00048900  |
| H | 0.84910200  | 2.12804000  | 0.00011000  |
| H | -1.64292800 | 2.18805900  | -0.00003500 |
| H | -2.95263800 | 0.06001300  | -0.00039500 |
| O | 2.30781500  | -0.11564500 | -0.00046900 |
| H | 2.68909200  | 0.77631400  | 0.00099800  |

#### 4b

|   |             |             |             |
|---|-------------|-------------|-------------|
| C | -1.50259500 | -1.18024000 | 0.01336300  |
| S | -2.78455000 | -2.20225200 | 0.27309400  |
| C | -1.67652800 | 0.29162300  | 0.00431100  |
| C | -2.75838800 | 0.84723200  | -0.70586900 |
| C | -0.82840700 | 1.14168200  | 0.73890400  |
| C | -2.98090600 | 2.22317100  | -0.69046100 |
| H | -3.41680600 | 0.18643600  | -1.27198400 |
| C | -1.07277900 | 2.51647600  | 0.76862100  |
| H | 0.02613500  | 0.72733900  | 1.28074300  |
| C | -2.14234300 | 3.06221400  | 0.05274800  |
| H | -3.81495200 | 2.64309900  | -1.25736200 |
| H | -0.41786500 | 3.16544400  | 1.35500300  |
| H | -2.32330900 | 4.13951900  | 0.07194900  |
| C | 1.29282700  | -0.68596400 | -0.77094900 |
| H | 1.63809000  | -1.01825400 | -1.75736000 |
| H | 0.79468900  | 0.28300800  | -0.89155100 |
| C | 2.48227900  | -0.60424200 | 0.18682600  |
| H | 3.00671900  | -1.58307000 | 0.14503800  |
| C | 3.53071600  | 0.41413500  | -0.34787400 |
| O | 3.63670000  | 0.52644300  | -1.59568300 |
| O | 4.22117500  | 1.01454600  | 0.51484200  |
| N | 2.08523600  | -0.25511200 | 1.54620400  |
| H | 1.78765100  | -1.09142100 | 2.04833200  |
| H | 2.92423200  | 0.09725200  | 2.00896300  |
| S | 0.05158000  | -1.93824800 | -0.23598100 |

#### TS3

imaginary frequency = -41.53 cm<sup>-1</sup>

|   |            |             |             |
|---|------------|-------------|-------------|
| C | 1.07879200 | 1.37927800  | 0.06713000  |
| S | 1.65166700 | 2.57247000  | -0.90700200 |
| C | 1.68627800 | 0.03778700  | 0.16173900  |
| C | 1.45772900 | -0.79493300 | 1.27743000  |
| C | 2.49846700 | -0.45034400 | -0.88593800 |

|   |             |             |             |
|---|-------------|-------------|-------------|
| C | 2.02304900  | -2.06837400 | 1.34339900  |
| H | 0.83322600  | -0.42961800 | 2.09203900  |
| C | 3.04717300  | -1.72655000 | -0.82397100 |
| H | 2.66897200  | 0.18276100  | -1.75748400 |
| C | 2.81289700  | -2.54165200 | 0.29204800  |
| H | 1.84114800  | -2.69541100 | 2.21883500  |
| H | 3.65654700  | -2.09500400 | -1.65217500 |
| H | 3.24413500  | -3.54428600 | 0.33798400  |
| C | -1.76302900 | 1.07404600  | 0.19790800  |
| H | -2.61161100 | 1.45212600  | 0.78398600  |
| H | -1.76603700 | 1.57057100  | -0.78446500 |
| C | -1.90688800 | -0.43489500 | 0.03156900  |
| H | -1.70586000 | -0.90086200 | 1.01691900  |
| C | -3.40790800 | -0.78029400 | -0.24914200 |
| O | -4.27260400 | -0.15316100 | 0.41337600  |
| O | -3.63259400 | -1.69087300 | -1.08770000 |
| N | -1.05742000 | -0.97285500 | -1.02706300 |
| H | -0.21301100 | -1.37902900 | -0.62909000 |
| H | -1.59281800 | -1.74236300 | -1.43497500 |
| S | -0.33107400 | 1.73871500  | 1.15196700  |

#### 4a

|   |             |             |             |
|---|-------------|-------------|-------------|
| C | -0.97648600 | 0.60728600  | 0.14862600  |
| S | -0.63779600 | 2.16080700  | 0.60745000  |
| C | -2.36429200 | 0.08658700  | 0.03259400  |
| C | -2.67312700 | -1.25552800 | 0.33071200  |
| C | -3.40298500 | 0.94461800  | -0.37851600 |
| C | -3.98384700 | -1.72254400 | 0.22102400  |
| H | -1.88909600 | -1.93010900 | 0.67862000  |
| C | -4.70805600 | 0.47124800  | -0.49827600 |
| H | -3.16725800 | 1.98424200  | -0.61040700 |
| C | -5.00406300 | -0.86352900 | -0.19735200 |
| H | -4.20822200 | -2.76194800 | 0.47072900  |
| H | -5.49974500 | 1.14649400  | -0.83073500 |
| H | -6.02869900 | -1.23176200 | -0.28675100 |
| C | 1.81403700  | 0.25710200  | 0.05132500  |
| H | 1.83727800  | 1.17654300  | -0.54541200 |
| H | 1.84110700  | 0.53024100  | 1.11661000  |
| C | 2.97993600  | -0.65765800 | -0.30889000 |
| H | 2.88916100  | -0.90935000 | -1.38714500 |
| C | 4.32225200  | 0.12868900  | -0.22197600 |

|   |            |             |             |
|---|------------|-------------|-------------|
| O | 4.29771100 | 1.34330900  | -0.54380700 |
| O | 5.33757200 | -0.53169100 | 0.11717900  |
| N | 3.02634700 | -1.84476200 | 0.54044500  |
| H | 2.46606900 | -2.58984000 | 0.12548000  |
| H | 3.99647200 | -2.16485400 | 0.51189300  |
| S | 0.23004700 | -0.58623700 | -0.27548700 |

### TS4a

imaginary frequency = -208.10 cm<sup>-1</sup>

|   |             |             |             |
|---|-------------|-------------|-------------|
| C | -0.31085600 | 1.03209500  | 0.06152400  |
| C | 2.31517400  | 1.04980300  | 0.52860400  |
| H | 3.19693300  | 0.84369500  | 1.14719200  |
| H | 2.29562100  | 2.11036100  | 0.24130400  |
| C | 2.28004300  | 0.12409300  | -0.69593200 |
| H | 3.02928900  | 0.48127900  | -1.42318600 |
| C | 2.67056200  | -1.33484400 | -0.32214000 |
| O | 3.73286100  | -1.47758000 | 0.32469700  |
| O | 1.89982600  | -2.24765000 | -0.72320200 |
| N | 0.94565300  | 0.14625900  | -1.28116800 |
| H | 0.69262600  | -0.81531000 | -1.53738800 |
| S | 0.81002800  | 0.67783000  | 1.47790700  |
| H | 0.82921400  | 0.80118200  | -2.05272700 |
| C | -1.49556700 | 0.09979000  | 0.05085400  |
| C | -1.33594200 | -1.28515900 | 0.24827500  |
| C | -2.79345700 | 0.60329300  | -0.13218700 |
| C | -2.44164300 | -2.13574700 | 0.25838200  |
| H | -0.33421600 | -1.69749400 | 0.37253700  |
| C | -3.90169000 | -0.24694500 | -0.11296600 |
| H | -2.91270100 | 1.67690000  | -0.28513500 |
| C | -3.73094500 | -1.62020100 | 0.08238500  |
| H | -2.29525400 | -3.20889500 | 0.40312600  |
| H | -4.90355800 | 0.16783000  | -0.24885300 |
| H | -4.59670900 | -2.28677800 | 0.09634500  |
| S | -0.44855200 | 2.63393100  | -0.50026900 |

### TS4b

imaginary frequency = -223.95 cm<sup>-1</sup>

|   |            |             |            |
|---|------------|-------------|------------|
| C | 0.19209500 | 0.76552100  | 0.45358700 |
| S | 0.14294900 | 2.46145900  | 0.64033400 |
| C | 1.52548200 | 0.14666800  | 0.09489100 |
| C | 2.11058700 | -0.87134300 | 0.86125000 |

|   |             |             |             |
|---|-------------|-------------|-------------|
| C | 2.23268500  | 0.63456100  | -1.02058400 |
| C | 3.36885200  | -1.38610800 | 0.52728200  |
| H | 1.58012500  | -1.25317100 | 1.73486900  |
| C | 3.47842800  | 0.11176100  | -1.36276200 |
| H | 1.79606400  | 1.44232000  | -1.61141500 |
| C | 4.05592000  | -0.90244100 | -0.58711400 |
| H | 3.80937700  | -2.17198300 | 1.14580800  |
| H | 4.00614300  | 0.49983200  | -2.23753900 |
| H | 5.03496800  | -1.30884700 | -0.85168000 |
| C | -1.20385100 | -1.56693900 | 0.47914500  |
| H | -1.98760600 | -2.19407400 | 0.92220600  |
| H | -0.30388400 | -2.17696000 | 0.31559800  |
| C | -1.70129800 | -0.92046400 | -0.82137000 |
| H | -1.69437800 | -1.67712500 | -1.62371300 |
| C | -3.16392100 | -0.40672300 | -0.67656900 |
| O | -4.00024000 | -1.23486300 | -0.24682400 |
| O | -3.37913500 | 0.78404700  | -1.01886200 |
| N | -0.81977100 | 0.19220100  | -1.15559300 |
| H | -1.40389500 | 1.00861500  | -1.37277000 |
| S | -0.84825400 | -0.18222600 | 1.60996200  |
| H | -0.14850400 | -0.00215800 | -1.89800600 |

### 5a

|   |             |             |             |
|---|-------------|-------------|-------------|
| C | -0.15188800 | 0.87567900  | -0.11742700 |
| C | 2.30556500  | 0.99116000  | 0.72276900  |
| H | 3.15803900  | 0.69248300  | 1.34475300  |
| H | 2.33695600  | 2.06888000  | 0.51219400  |
| C | 2.26424300  | 0.17181000  | -0.56113200 |
| H | 2.93342900  | 0.58972200  | -1.32663400 |
| C | 2.64841500  | -1.32054100 | -0.33989600 |
| O | 3.72737400  | -1.53872900 | 0.24301400  |
| O | 1.83186800  | -2.16880400 | -0.79653700 |
| N | 0.86017400  | 0.19451100  | -1.08592300 |
| H | 0.67231900  | -0.81940000 | -1.25731100 |
| S | 0.73156800  | 0.59804600  | 1.54539100  |
| H | 0.78790000  | 0.73424500  | -1.95528100 |
| C | -1.43912800 | 0.05086500  | -0.06455500 |
| C | -1.39617800 | -1.35107000 | 0.04483400  |
| C | -2.68729000 | 0.68450000  | -0.06470700 |
| C | -2.57481700 | -2.09479600 | 0.13405400  |
| H | -0.43666800 | -1.87176200 | 0.06751400  |

|   |             |             |             |
|---|-------------|-------------|-------------|
| C | -3.86761200 | -0.05773600 | 0.03961300  |
| H | -2.70072400 | 1.77240900  | -0.15205900 |
| C | -3.81700700 | -1.45085100 | 0.13497700  |
| H | -2.52081300 | -3.18357400 | 0.20973500  |
| H | -4.83130700 | 0.45784200  | 0.04334400  |
| H | -4.73868300 | -2.03285600 | 0.21142300  |
| S | -0.28540700 | 2.58299000  | -0.62284200 |

### 5b

|   |             |             |             |
|---|-------------|-------------|-------------|
| C | 0.10482500  | 0.77170100  | 0.23717800  |
| S | 0.24626700  | 2.54719300  | 0.29429300  |
| C | 1.45474000  | 0.09513200  | -0.01117900 |
| C | 2.15154100  | -0.58792600 | 0.99460700  |
| C | 2.06562700  | 0.22067300  | -1.27335100 |
| C | 3.41838500  | -1.13013800 | 0.75091300  |
| H | 1.69329300  | -0.69312600 | 1.97898600  |
| C | 3.32191100  | -0.33165600 | -1.52242500 |
| H | 1.57175600  | 0.78580900  | -2.06769700 |
| C | 4.00881900  | -1.01066100 | -0.50861300 |
| H | 3.94177800  | -1.65384500 | 1.55485300  |
| H | 3.77118000  | -0.22266900 | -2.51267000 |
| H | 4.99514600  | -1.43923000 | -0.70118100 |
| C | -1.19056600 | -1.45232900 | 0.75548000  |
| H | -2.01027300 | -2.00839400 | 1.22702500  |
| H | -0.30657500 | -2.10263600 | 0.68836200  |
| C | -1.62588800 | -0.92857400 | -0.61621100 |
| H | -1.42274800 | -1.66329400 | -1.40733200 |
| C | -3.14012800 | -0.56185800 | -0.64924500 |
| O | -3.93163600 | -1.48437700 | -0.36732500 |
| O | -3.41411200 | 0.62721800  | -0.95897600 |
| N | -0.85947400 | 0.32686000  | -0.89657400 |
| H | -1.60448400 | 1.05271200  | -0.98197200 |
| S | -0.80278700 | 0.06075600  | 1.70283000  |
| H | -0.35805200 | 0.28055000  | -1.78883900 |

### 6a

|   |             |             |             |
|---|-------------|-------------|-------------|
| C | -0.26385500 | -0.44134100 | 0.43064200  |
| C | 1.95885400  | -1.71650800 | -0.52004700 |
| H | 2.16048500  | -1.80304000 | -1.59717700 |
| H | 2.63743100  | -2.38862500 | 0.01952200  |
| C | 2.12987900  | -0.27959700 | -0.03944800 |

|   |             |             |             |
|---|-------------|-------------|-------------|
| H | 2.28110400  | -0.26712600 | 1.05039200  |
| C | 3.26548600  | 0.51737800  | -0.71038200 |
| O | 4.32665700  | -0.11457500 | -0.91611400 |
| O | 3.02622600  | 1.72682900  | -0.95273600 |
| N | 0.81587400  | 0.38387500  | -0.24221200 |
| H | 0.63661900  | 0.47806500  | -1.25080200 |
| S | 0.20064800  | -2.17352500 | -0.20558500 |
| O | 0.58024500  | 2.64693800  | 1.32655200  |
| H | 0.26140400  | 1.86755200  | 1.86391100  |
| H | 1.51233200  | 2.72979700  | 1.58567200  |
| H | 0.83119700  | 1.35123700  | 0.17041600  |
| C | -1.63048100 | -0.06819900 | -0.10350100 |
| C | -2.70251900 | -0.95863200 | 0.08471800  |
| C | -1.87979800 | 1.15980200  | -0.73395500 |
| C | -3.98439500 | -0.63493200 | -0.35522700 |
| H | -2.52774600 | -1.90821900 | 0.59535200  |
| C | -3.16950000 | 1.48483700  | -1.17231800 |
| H | -1.08208600 | 1.89110600  | -0.87102600 |
| C | -4.22558200 | 0.59168600  | -0.98843700 |
| H | -4.80279900 | -1.34256200 | -0.20169700 |
| H | -3.34238000 | 2.44814300  | -1.65828300 |
| H | -5.23082100 | 0.84670900  | -1.33169900 |
| S | -0.16936000 | -0.23839200 | 2.22477400  |

### 6b

|   |             |             |             |
|---|-------------|-------------|-------------|
| C | 0.22239400  | 0.89252600  | 0.17049400  |
| S | 0.35355300  | 2.60947000  | -0.35363600 |
| C | 1.53612800  | 0.13214700  | -0.01384200 |
| C | 2.24716000  | -0.43649900 | 1.04894300  |
| C | 2.05760000  | 0.00445600  | -1.31528100 |
| C | 3.45546800  | -1.10748400 | 0.82417800  |
| H | 1.85016200  | -0.34699700 | 2.06090400  |
| C | 3.25191100  | -0.67805600 | -1.54227400 |
| H | 1.53184700  | 0.46753100  | -2.15346800 |
| C | 3.96122400  | -1.23484600 | -0.47014100 |
| H | 3.99752000  | -1.53636300 | 1.67059200  |
| H | 3.63775000  | -0.76842700 | -2.56065200 |
| H | 4.90146400  | -1.76259700 | -0.64666900 |
| C | -1.29259000 | -0.87591400 | 1.57678800  |
| H | -2.34069500 | -0.80582700 | 1.89685700  |
| H | -0.80581800 | -1.67617200 | 2.14922000  |



|   |             |             |             |
|---|-------------|-------------|-------------|
| C | -1.18435100 | -1.15488300 | 0.06672400  |
| H | -0.33819100 | -1.83021100 | -0.12114200 |
| C | -2.44958600 | -1.79575000 | -0.54891000 |
| O | -2.89749100 | -2.78926300 | 0.06791900  |
| O | -2.88940400 | -1.27507800 | -1.60242100 |
| N | -0.85953800 | 0.13212300  | -0.60411400 |
| H | -1.71022300 | 0.74732900  | -0.64595700 |
| S | -0.50076800 | 0.76064100  | 1.88165100  |
| O | -2.70979100 | 2.22483900  | -0.59803600 |
| H | -1.80066500 | 2.61818100  | -0.45629300 |
| H | -2.83349500 | 2.32300800  | -1.55604900 |
| H | -0.57611900 | -0.03425800 | -1.57655500 |

### TS5a

imaginary frequency = -1182.74 cm<sup>-1</sup>

|   |             |             |             |
|---|-------------|-------------|-------------|
| C | -0.24863300 | -0.42683800 | 0.37484900  |
| C | 1.94057600  | -1.64782800 | -0.63372000 |
| H | 2.08478400  | -1.66074300 | -1.72409600 |
| H | 2.65634400  | -2.34383100 | -0.17798300 |
| C | 2.10287300  | -0.23090500 | -0.07163700 |
| H | 2.32183800  | -0.30238300 | 1.00555000  |
| C | 3.23459300  | 0.57990200  | -0.73442500 |
| O | 4.29591600  | -0.05166300 | -0.96098400 |
| O | 3.00980000  | 1.79490400  | -0.96426400 |
| N | 0.80236400  | 0.44452500  | -0.18150600 |
| H | 0.61497900  | 0.64092000  | -1.16948300 |
| S | 0.21578400  | -2.15501200 | -0.24795000 |
| O | 0.70375700  | 2.24748900  | 1.52731600  |
| H | 0.26869000  | 1.28888800  | 2.07292000  |
| H | 1.60257100  | 2.35842500  | 1.88327700  |
| H | 0.83181900  | 1.59645500  | 0.61164200  |
| C | -1.62369600 | -0.03955200 | -0.12846100 |
| C | -2.68385200 | -0.95955000 | -0.04912600 |
| C | -1.88696500 | 1.24387000  | -0.63066900 |
| C | -3.96586900 | -0.61129000 | -0.47042200 |
| H | -2.50284900 | -1.95669000 | 0.35845000  |
| C | -3.17585000 | 1.59399700  | -1.05121900 |
| H | -1.09322900 | 1.99020900  | -0.68233900 |
| C | -4.21912400 | 0.66996800  | -0.97760400 |
| H | -4.77411300 | -1.34368700 | -0.40323000 |
| H | -3.35856100 | 2.59924000  | -1.43882900 |

|   |             |             |             |
|---|-------------|-------------|-------------|
| H | -5.22401900 | 0.94327500  | -1.30777600 |
| S | -0.21359100 | -0.33737800 | 2.22673100  |

### TS5b

imaginary frequency = -1263.06 cm<sup>-1</sup>

|   |             |             |             |
|---|-------------|-------------|-------------|
| C | 0.26957600  | 0.75910800  | -0.02805400 |
| S | 0.56105000  | 2.35202900  | -0.89609900 |
| C | 1.54370400  | -0.07416900 | -0.08211300 |
| C | 2.67185000  | 0.34264700  | 0.64563800  |
| C | 1.65228700  | -1.22196800 | -0.87884300 |
| C | 3.87014000  | -0.36579800 | 0.57885900  |
| H | 2.60432900  | 1.23590000  | 1.26965500  |
| C | 2.85438400  | -1.93854400 | -0.94247100 |
| H | 0.80354600  | -1.57896700 | -1.46489000 |
| C | 3.96813300  | -1.51492900 | -0.21672300 |
| H | 4.73416200  | -0.02158600 | 1.15270400  |
| H | 2.91258300  | -2.83329500 | -1.56706300 |
| H | 4.90556100  | -2.07385800 | -0.26566800 |
| C | -1.64986700 | -0.18936100 | 1.67256100  |
| H | -2.60416400 | 0.35734000  | 1.67885500  |
| H | -1.62951200 | -0.87789500 | 2.52633900  |
| C | -1.45035800 | -0.93016500 | 0.35229300  |
| H | -0.71039700 | -1.73593000 | 0.50109000  |
| C | -2.73630900 | -1.58420600 | -0.19827300 |
| O | -3.41344400 | -2.23848200 | 0.63184400  |
| O | -2.97390700 | -1.42702000 | -1.42204400 |
| N | -0.92030700 | 0.07670200  | -0.57850100 |
| H | -1.82500400 | 1.09834300  | -0.80113600 |
| S | -0.26504700 | 1.02083400  | 1.77204700  |
| O | -2.24889300 | 2.14949200  | -0.96431300 |
| H | -1.10273900 | 2.52428200  | -0.97814600 |
| H | -2.51513100 | 2.16331600  | -1.89978100 |
| H | -0.73842500 | -0.32798500 | -1.49875500 |

### 7a

|   |             |             |             |
|---|-------------|-------------|-------------|
| C | -0.22512800 | -0.51330000 | 0.35900700  |
| C | 2.00261500  | -1.59878200 | -0.65599200 |
| H | 2.10896900  | -1.51952400 | -1.74850700 |
| H | 2.75976200  | -2.29503700 | -0.27268300 |
| C | 2.11454100  | -0.20826700 | 0.00829700  |
| H | 2.41419400  | -0.33670700 | 1.05828600  |

|   |             |             |             |
|---|-------------|-------------|-------------|
| C | 3.17162200  | 0.64713400  | -0.72330400 |
| O | 4.36733100  | 0.32071400  | -0.52498000 |
| O | 2.74661600  | 1.55532900  | -1.48201200 |
| N | 0.79934300  | 0.41223900  | -0.03216200 |
| H | 0.63710300  | 0.75146800  | -0.98499700 |
| S | 0.32136900  | -2.22138800 | -0.26634000 |
| O | 0.76831300  | 2.93257800  | 1.22533200  |
| H | -0.69130100 | 0.51519500  | 2.49717700  |
| H | 0.25317200  | 2.73713200  | 2.02222400  |
| H | 0.84036200  | 2.04431100  | 0.79621700  |
| C | -1.59710600 | -0.09135900 | -0.12239900 |
| C | -2.57676300 | -1.03259700 | -0.46944700 |
| C | -1.92063300 | 1.27551200  | -0.16821500 |
| C | -3.85027300 | -0.61905500 | -0.86546100 |
| H | -2.34679900 | -2.09887500 | -0.43140000 |
| C | -3.19483500 | 1.68635500  | -0.56899800 |
| H | -1.18116000 | 2.01795200  | 0.13354700  |
| C | -4.16399800 | 0.74274800  | -0.92057500 |
| H | -4.60014000 | -1.36655500 | -1.13473000 |
| H | -3.42915200 | 2.75306800  | -0.60216700 |
| H | -5.15972000 | 1.06578300  | -1.23326400 |
| S | -0.24755700 | -0.73818700 | 2.21266800  |

### 7b

|   |             |             |             |
|---|-------------|-------------|-------------|
| C | 0.27862000  | 0.70769500  | -0.07019700 |
| S | 0.57919300  | 2.26811200  | -1.03076100 |
| C | 1.60096600  | -0.05678600 | -0.08437300 |
| C | 2.73158300  | 0.48617000  | 0.54882400  |
| C | 1.72369800  | -1.28560800 | -0.74532100 |
| C | 3.95374100  | -0.18557900 | 0.52389900  |
| H | 2.65186600  | 1.44183000  | 1.07172200  |
| C | 2.94848400  | -1.96297800 | -0.76496000 |
| H | 0.86527500  | -1.73234300 | -1.24973800 |
| C | 4.06683700  | -1.41717100 | -0.13244500 |
| H | 4.82185900  | 0.25218800  | 1.02244000  |
| H | 3.02304000  | -2.92333600 | -1.28057500 |
| H | 5.02208100  | -1.94697700 | -0.14833600 |
| C | -1.68487300 | -0.05318100 | 1.62240500  |
| H | -2.60650200 | 0.53557100  | 1.51377400  |
| H | -1.74282900 | -0.65294800 | 2.53869900  |
| C | -1.43374700 | -0.91389700 | 0.38685500  |

|   |             |             |             |
|---|-------------|-------------|-------------|
| H | -0.71177300 | -1.71049900 | 0.65723100  |
| C | -2.69238700 | -1.62692800 | -0.15180000 |
| O | -3.46147100 | -2.11463300 | 0.71380400  |
| O | -2.81781800 | -1.69331000 | -1.40053400 |
| N | -0.87128600 | 0.00873300  | -0.59925600 |
| H | -2.21789100 | 1.21847200  | -0.82277300 |
| S | -0.23836400 | 1.08125900  | 1.70328400  |
| O | -2.85673900 | 1.97628300  | -0.86468200 |
| H | -0.71308000 | 2.67543900  | -0.94517300 |
| H | -2.92733200 | 2.14162500  | -1.81709200 |
| H | -0.68826900 | -0.44722700 | -1.49177200 |

### 8a

|   |             |             |             |
|---|-------------|-------------|-------------|
| C | -0.15601700 | -0.48234000 | 0.26467000  |
| C | 2.07907800  | -0.78173800 | -1.17611400 |
| H | 2.17625700  | -0.07787300 | -2.01674200 |
| H | 2.85528500  | -1.55396000 | -1.26271100 |
| C | 2.17265900  | -0.02346800 | 0.17172700  |
| H | 2.49147700  | -0.72682700 | 0.95319700  |
| C | 3.21061600  | 1.11265700  | 0.04040000  |
| O | 4.40535100  | 0.80918300  | 0.27556100  |
| O | 2.77580200  | 2.22699600  | -0.35301500 |
| N | 0.85363800  | 0.49420700  | 0.49285400  |
| H | 0.69981000  | 1.31973300  | -0.09218700 |
| S | 0.41684400  | -1.54482800 | -1.22305700 |
| C | -1.52978000 | 0.11271900  | 0.04738400  |
| C | -2.54133700 | -0.63212000 | -0.58076800 |
| C | -1.82960500 | 1.40311400  | 0.50819300  |
| C | -3.81506900 | -0.09397700 | -0.75981400 |
| H | -2.33127700 | -1.64512900 | -0.93007400 |
| C | -3.10883600 | 1.94202300  | 0.32955800  |
| H | -1.06574200 | 1.99171600  | 1.01700800  |
| C | -4.10489000 | 1.19866200  | -0.30593600 |
| H | -4.58657100 | -0.68628600 | -1.25752500 |
| H | -3.32278800 | 2.94997000  | 0.69309900  |
| H | -5.10301500 | 1.61996800  | -0.44686700 |
| S | -0.21513300 | -1.74085400 | 1.64150800  |
| H | -0.72642300 | -0.90245200 | 2.58142900  |

### 8b

|   |            |             |            |
|---|------------|-------------|------------|
| C | 0.17173700 | -0.81821400 | 0.32977100 |
|---|------------|-------------|------------|

|   |             |             |             |
|---|-------------|-------------|-------------|
| S | 0.82490300  | -2.05469900 | 1.55028200  |
| C | 1.35062500  | 0.12031400  | 0.05548900  |
| C | 2.51649100  | -0.36624700 | -0.55923900 |
| C | 1.30494900  | 1.46615500  | 0.44213000  |
| C | 3.60903400  | 0.47190400  | -0.78197800 |
| H | 2.56601000  | -1.41218400 | -0.86981800 |
| C | 2.39870400  | 2.30927700  | 0.21364900  |
| H | 0.41211700  | 1.87216800  | 0.92063100  |
| C | 3.55372400  | 1.81695800  | -0.39690300 |
| H | 4.50735200  | 0.07478600  | -1.26078200 |
| H | 2.34244000  | 3.35726500  | 0.51760000  |
| H | 4.40727900  | 2.47550800  | -0.57383600 |
| C | -1.96416400 | -0.73215400 | -1.31146500 |
| H | -2.79139700 | -1.38775300 | -1.00444100 |
| H | -2.14934600 | -0.36833300 | -2.33002700 |
| C | -1.75691900 | 0.40535200  | -0.31992300 |
| H | -1.14430800 | 1.18330400  | -0.82397700 |
| C | -3.03205200 | 1.12961200  | 0.15338800  |
| O | -4.02090500 | 1.11826900  | -0.62151700 |
| O | -2.94953800 | 1.71752200  | 1.26366900  |
| N | -1.04120900 | -0.20538000 | 0.79773200  |
| S | -0.37650400 | -1.66508500 | -1.26198600 |
| H | -0.30098900 | -2.80601700 | 1.58954500  |
| H | -0.88430200 | 0.46137000  | 1.55152600  |

## 9a

|   |             |             |             |
|---|-------------|-------------|-------------|
| C | 0.25234700  | -0.73758200 | -0.17616100 |
| C | -1.94710300 | -0.69051700 | 1.34394900  |
| H | -2.05833500 | 0.23420200  | 1.92959200  |
| H | -2.68732300 | -1.42704900 | 1.68510200  |
| C | -2.08783400 | -0.38883400 | -0.16497400 |
| H | -2.32230800 | -1.32311400 | -0.69085000 |
| C | -3.24162300 | 0.60413400  | -0.41113900 |
| O | -4.35025500 | 0.11562600  | -0.71588000 |
| O | -3.00034000 | 1.83753600  | -0.24151100 |
| N | -0.80143400 | 0.11139200  | -0.63844600 |
| H | -0.65876300 | 1.04109000  | -0.23168000 |
| S | -0.24959300 | -1.34042600 | 1.56438300  |
| C | 1.60511400  | -0.05728000 | -0.13227700 |
| C | 2.66607400  | -0.63788900 | 0.58239100  |
| C | 1.83740000  | 1.13729200  | -0.82927200 |

|   |             |             |             |
|---|-------------|-------------|-------------|
| C | 3.92325400  | -0.03494100 | 0.60940300  |
| H | 2.50956900  | -1.57387100 | 1.12400900  |
| C | 3.09856400  | 1.74260400  | -0.80047400 |
| H | 1.03648800  | 1.59801400  | -1.40728800 |
| C | 4.14528800  | 1.16222400  | -0.08181900 |
| H | 4.73393000  | -0.50105300 | 1.17439600  |
| H | 3.25867000  | 2.67498100  | -1.34732300 |
| H | 5.12925800  | 1.63629400  | -0.06013900 |
| S | 0.32591500  | -2.18992000 | -1.36323000 |
| H | 0.97961200  | -3.02971200 | -0.52818900 |
| O | -0.78244400 | 2.80477100  | 0.87706800  |
| H | -0.33493400 | 3.22376000  | 0.12658500  |
| H | -1.64153000 | 2.49353000  | 0.48128400  |

## TS6a

imaginary frequency = -225.42 cm<sup>-1</sup>

|   |             |             |             |
|---|-------------|-------------|-------------|
| C | -0.22684000 | -0.71463600 | 0.37338400  |
| C | 1.98700700  | -1.36493600 | -0.98977700 |
| H | 1.92747400  | -0.93501200 | -2.00096500 |
| H | 2.80906900  | -2.09052300 | -0.94974200 |
| C | 2.12401500  | -0.25843700 | 0.06846100  |
| H | 2.52855900  | -0.72255800 | 0.99361900  |
| C | 3.15315600  | 0.81041000  | -0.35227300 |
| O | 4.24905100  | 0.36749200  | -0.76292700 |
| O | 2.84978000  | 2.03308500  | -0.24189800 |
| N | 0.78995900  | 0.23778400  | 0.27528600  |
| H | 0.57322100  | 1.23118600  | 0.25031600  |
| S | 0.41663400  | -2.21044700 | -0.56746500 |
| C | -1.56599500 | -0.15630000 | -0.08240000 |
| C | -2.27228300 | -0.66910300 | -1.17705500 |
| C | -2.10237800 | 0.93979800  | 0.61756600  |
| C | -3.49070900 | -0.10197500 | -1.56534900 |
| H | -1.86063100 | -1.51428000 | -1.73016600 |
| C | -3.31653200 | 1.50709300  | 0.22687000  |
| H | -1.56735700 | 1.34898200  | 1.47631200  |
| C | -4.01742700 | 0.98676200  | -0.86630500 |
| H | -4.02882000 | -0.51651900 | -2.42130300 |
| H | -3.71706200 | 2.35961400  | 0.78067300  |
| H | -4.96941400 | 1.42862300  | -1.16996700 |
| S | -0.59868900 | -1.35903100 | 2.17037300  |
| H | 0.61687200  | -1.92734600 | 2.34338200  |

|   |            |            |            |
|---|------------|------------|------------|
| O | 0.57811600 | 3.22455800 | 0.46856700 |
| H | 0.56617100 | 3.06749400 | 1.42506200 |
| H | 1.45742400 | 2.84436200 | 0.20058300 |

### 10a

|   |             |             |             |
|---|-------------|-------------|-------------|
| C | -0.30220400 | -0.41143500 | 0.30042100  |
| C | 1.77829700  | -1.78721500 | -0.66260200 |
| H | 1.84923600  | -1.79718300 | -1.75846500 |
| H | 2.46971700  | -2.53115300 | -0.24649000 |
| C | 2.02920900  | -0.38916100 | -0.11401200 |
| H | 2.28133900  | -0.46744500 | 0.96531900  |
| C | 3.20241700  | 0.37886600  | -0.75439700 |
| O | 3.95407400  | -0.22723900 | -1.54653100 |
| O | 3.32798000  | 1.58684200  | -0.38908800 |
| N | 0.76388800  | 0.31759500  | -0.30418100 |
| H | 0.80947300  | 1.27045400  | 0.06485300  |
| S | 0.05183800  | -2.18565200 | -0.15224000 |
| C | -1.68148700 | 0.02651400  | -0.15226200 |
| C | -2.82070900 | -0.68212000 | 0.26519600  |
| C | -1.84275600 | 1.14262300  | -0.98316500 |
| C | -4.09316600 | -0.28514600 | -0.14565400 |
| H | -2.70851700 | -1.54969200 | 0.91902100  |
| C | -3.12039900 | 1.54530200  | -1.38710900 |
| H | -0.96625200 | 1.69487500  | -1.32133200 |
| C | -4.24845600 | 0.83491000  | -0.97126100 |
| H | -4.96873300 | -0.85063000 | 0.18188700  |
| H | -3.22983400 | 2.42094300  | -2.03143900 |
| H | -5.24536500 | 1.14968900  | -1.28871400 |
| S | -0.34448600 | -0.23254100 | 2.21967800  |
| H | 0.75697300  | -0.98285600 | 2.45450500  |
| O | 1.62059400  | 2.61294000  | 1.42652800  |
| H | 1.34443600  | 1.86514600  | 1.98205600  |
| H | 2.31703700  | 2.22661200  | 0.83085900  |

### TS7a

imaginary frequency = -78.24 cm<sup>-1</sup>

|   |             |             |             |
|---|-------------|-------------|-------------|
| C | -0.24125900 | -0.60213000 | -0.07824600 |
| C | 2.00129300  | -1.86531600 | -0.01928100 |
| H | 2.22179000  | -2.28170200 | -1.01196000 |
| H | 2.65332200  | -2.32602800 | 0.73142500  |
| C | 2.07167200  | -0.34854200 | -0.00632400 |

|   |             |             |             |
|---|-------------|-------------|-------------|
| H | 2.09819600  | 0.00734000  | 1.04407200  |
| C | 3.27025700  | 0.29793200  | -0.72652200 |
| O | 4.20812300  | -0.44356800 | -1.08132300 |
| O | 3.20345900  | 1.55445900  | -0.85491200 |
| N | 0.78935400  | 0.08932000  | -0.55690800 |
| H | 0.67956600  | 1.10797900  | -0.66288900 |
| S | 0.23832100  | -2.22350400 | 0.40774900  |
| C | -1.64139500 | -0.24539900 | -0.33486700 |
| C | -2.65122700 | -1.21988400 | -0.25095600 |
| C | -1.98866900 | 1.07539700  | -0.68345900 |
| C | -3.98090900 | -0.88288000 | -0.50531600 |
| H | -2.40016200 | -2.25029400 | 0.00811600  |
| C | -3.31689700 | 1.40400500  | -0.93970900 |
| H | -1.22598100 | 1.85383800  | -0.71786200 |
| C | -4.31800400 | 0.42811400  | -0.85236200 |
| H | -4.75489100 | -1.65010800 | -0.43552000 |
| H | -3.57539000 | 2.43186700  | -1.20324400 |
| H | -5.35896100 | 0.69189900  | -1.05223000 |
| S | -0.33130300 | 0.79524700  | 2.34046300  |
| H | 0.79489600  | 0.32309600  | 2.92739300  |
| O | 0.97079400  | 2.80706500  | 0.16257000  |
| H | 0.68284800  | 2.27884400  | 0.95226100  |
| H | 1.85882700  | 2.44870900  | -0.08103100 |

### 11

|   |             |             |             |
|---|-------------|-------------|-------------|
| C | 0.74637800  | -0.63456500 | -0.30988600 |
| C | -1.22245800 | -2.18084500 | -0.83274800 |
| H | -1.77131200 | -2.99119200 | -0.33988500 |
| H | -1.36144700 | -2.23769300 | -1.92076100 |
| C | -1.60338300 | -0.82524600 | -0.25029300 |
| H | -2.38051900 | -0.31271800 | -0.85148800 |
| C | -2.16232100 | -0.87534600 | 1.20775800  |
| O | -2.83266000 | -1.88262200 | 1.50702500  |
| O | -1.93447200 | 0.12886000  | 1.93643500  |
| N | -0.39458900 | -0.00574300 | -0.31025200 |
| H | -0.50857600 | 1.02094900  | -0.08970900 |
| S | 0.58339400  | -2.36242000 | -0.48534100 |
| C | 2.04344200  | 0.01591200  | -0.14025200 |
| C | 3.23072400  | -0.68277100 | -0.43069400 |
| C | 2.11472400  | 1.34474700  | 0.32677700  |
| C | 4.46724800  | -0.06567500 | -0.25467500 |

|   |             |             |             |
|---|-------------|-------------|-------------|
| H | 3.18895700  | -1.70577900 | -0.80989500 |
| C | 3.35494900  | 1.95350600  | 0.49859000  |
| H | 1.20380600  | 1.89741400  | 0.56191700  |
| C | 4.53141500  | 1.25172800  | 0.21057500  |
| H | 5.38318600  | -0.61309700 | -0.48516200 |
| H | 3.40471800  | 2.98102500  | 0.86426100  |
| H | 5.50156400  | 1.73433600  | 0.34851700  |
| S | -3.56783400 | 1.97495900  | -1.30121800 |
| H | -4.13563600 | 1.44136400  | -0.19218200 |
| O | -1.17971600 | 2.39189600  | 0.59957300  |
| H | -1.94611600 | 2.40237900  | -0.06601700 |
| H | -1.49498700 | 1.70884900  | 1.24191700  |

### TS8

imaginary frequency =  $-946.86 \text{ cm}^{-1}$

|   |             |             |             |
|---|-------------|-------------|-------------|
| C | -0.68315500 | -0.71550800 | 0.08852400  |
| C | 1.31592800  | -2.26941000 | 0.42661500  |
| H | 1.43683800  | -2.94150200 | -0.43328800 |
| H | 1.91779500  | -2.64578200 | 1.26173100  |
| C | 1.64866900  | -0.81873700 | 0.06329200  |
| H | 2.03227900  | -0.25665400 | 0.94022200  |
| C | 2.77226000  | -0.71242900 | -1.00274800 |
| O | 2.87271600  | 0.36706700  | -1.66094400 |
| O | 3.54135000  | -1.68891700 | -1.08762200 |
| N | 0.40270700  | -0.14575800 | -0.31273400 |
| H | 0.60487600  | 1.07486700  | -0.65965700 |
| S | -0.45548700 | -2.25730000 | 0.91816400  |
| C | -2.02699500 | -0.14023000 | -0.07151500 |
| C | -3.16543300 | -0.87144200 | 0.31318800  |
| C | -2.19079700 | 1.15403300  | -0.60403200 |
| C | -4.43915800 | -0.32034200 | 0.17677900  |
| H | -3.06143500 | -1.88146100 | 0.71504300  |
| C | -3.46572400 | 1.69830500  | -0.74076700 |
| H | -1.32203100 | 1.73715600  | -0.90877600 |
| C | -4.59231200 | 0.96546300  | -0.34972000 |
| H | -5.31414600 | -0.89894300 | 0.47975100  |
| H | -3.58132600 | 2.70276600  | -1.15332200 |
| H | -5.58997600 | 1.39693600  | -0.45803200 |
| S | 2.43044600  | 2.42273800  | 1.72814600  |
| H | 3.52012600  | 1.91436100  | 1.10395700  |
| O | 1.14125000  | 2.12011600  | -0.93820800 |

|   |            |            |             |
|---|------------|------------|-------------|
| H | 1.54264800 | 2.36038300 | 0.00786100  |
| H | 1.91384700 | 1.60683100 | -1.35081500 |

### 12

|   |             |             |             |
|---|-------------|-------------|-------------|
| C | -0.10595800 | 0.26555700  | -0.18779600 |
| C | -1.53940600 | -0.06117200 | -0.04310600 |
| C | -2.48187000 | 0.92239300  | 0.30170100  |
| C | -1.98009200 | -1.38036400 | -0.25825800 |
| C | -3.83390600 | 0.59632300  | 0.42746800  |
| H | -2.15679200 | 1.94853600  | 0.48526400  |
| C | -3.32920100 | -1.70444800 | -0.12762000 |
| H | -1.25136300 | -2.14270400 | -0.53515500 |
| C | -4.26144300 | -0.71708300 | 0.21475800  |
| H | -4.55417500 | 1.37213700  | 0.69636600  |
| H | -3.65852300 | -2.73213900 | -0.29757400 |
| H | -5.31904700 | -0.97223700 | 0.31436700  |
| C | 2.13893300  | 1.44818300  | -0.12874900 |
| H | 2.46875600  | 1.56221100  | 0.91279500  |
| H | 2.77396200  | 2.06269100  | -0.77986600 |
| C | 2.14347900  | -0.03485800 | -0.52654400 |
| H | 2.36596100  | -0.14839500 | -1.60187400 |
| C | 3.21659500  | -0.88260500 | 0.22591800  |
| O | 3.54577600  | -1.95509200 | -0.33733200 |
| O | 3.64040700  | -0.44858900 | 1.32576900  |
| N | 0.81785700  | -0.61010700 | -0.30505500 |
| S | 0.39462300  | 1.98990900  | -0.27206600 |

### TS9

imaginary frequency =  $-237.87 \text{ cm}^{-1}$

|   |            |             |             |
|---|------------|-------------|-------------|
| C | 0.12927800 | 0.49847000  | -0.02280100 |
| C | 1.54085900 | 0.16721800  | -0.25887400 |
| C | 2.55438900 | 1.06458800  | 0.11819900  |
| C | 1.88714000 | -1.04713500 | -0.87342100 |
| C | 3.89127200 | 0.74778100  | -0.10732800 |
| H | 2.29525700 | 2.00074500  | 0.61653500  |
| C | 3.22980700 | -1.36245000 | -1.09248900 |
| H | 1.10989500 | -1.74006500 | -1.19680300 |
| C | 4.23375200 | -0.46871900 | -0.71127600 |
| H | 4.67209200 | 1.44905900  | 0.19444300  |
| H | 3.48965100 | -2.30844700 | -1.57246000 |
| H | 5.28321000 | -0.71601600 | -0.88646300 |

|   |             |             |             |
|---|-------------|-------------|-------------|
| C | -2.17449900 | 1.60523800  | -0.27138700 |
| H | -2.43554400 | 1.72127700  | -1.33251300 |
| H | -2.83997800 | 2.22604400  | 0.33841600  |
| C | -2.17833000 | 0.14219100  | 0.15850400  |
| H | -2.30067100 | 0.08025100  | 1.25766900  |
| C | -3.30777100 | -0.70792400 | -0.46694300 |
| O | -4.37390300 | -0.09871000 | -0.72287900 |
| O | -3.06477100 | -1.92928800 | -0.61575100 |
| N | -0.84968200 | -0.37563300 | -0.16065000 |
| S | -0.42863000 | 2.16280100  | -0.04314000 |
| O | 0.49730200  | 0.07196700  | 2.26617000  |
| H | 0.24003900  | -1.28025500 | 1.92249000  |
| H | -0.37454100 | 0.40564400  | 2.52352400  |
| O | 0.01636800  | -2.26284900 | 1.53859700  |
| H | 0.86910800  | -2.56083200 | 1.18871300  |
| H | -0.63800500 | -1.33728000 | 0.19905300  |

### TS9a

imaginary frequency = -277.08 cm<sup>-1</sup>

|   |             |             |             |
|---|-------------|-------------|-------------|
| C | 0.01185500  | -0.66275300 | -0.02207800 |
| C | -1.39216500 | -0.40611800 | -0.38760700 |
| C | -2.41800100 | -1.23072400 | 0.10148300  |
| C | -1.70810700 | 0.66164800  | -1.24166800 |
| C | -3.74381000 | -0.97363800 | -0.23887900 |
| H | -2.17426300 | -2.04236300 | 0.78756700  |
| C | -3.03959600 | 0.91669600  | -1.57785300 |
| H | -0.91685300 | 1.29087600  | -1.64892400 |
| C | -4.05931300 | 0.10463000  | -1.07539700 |
| H | -4.53762800 | -1.61039400 | 0.15755600  |
| H | -3.27808100 | 1.75241300  | -2.23926400 |
| H | -5.10042200 | 0.30786900  | -1.33629400 |
| C | 2.37668800  | -1.66977300 | -0.15814700 |
| H | 2.70268500  | -1.81124600 | -1.19800600 |
| H | 3.03677400  | -2.23713700 | 0.50725600  |
| C | 2.30268000  | -0.18930500 | 0.21841500  |
| H | 2.43075000  | -0.07982400 | 1.31278900  |
| C | 3.39762000  | 0.67937100  | -0.44737800 |
| O | 4.51614200  | 0.12698600  | -0.57836600 |
| O | 3.08051700  | 1.85343200  | -0.74926500 |
| N | 0.95073300  | 0.24964000  | -0.11587800 |
| S | 0.64954500  | -2.30265600 | -0.00325100 |

|   |             |             |             |
|---|-------------|-------------|-------------|
| O | -0.53679400 | -0.49137200 | 2.23084900  |
| H | -1.16138600 | 0.67783800  | 2.11366100  |
| H | 0.36637700  | -0.27051300 | 2.50125900  |
| O | 0.11328500  | 2.79355500  | 0.47427300  |
| H | -0.37546600 | 3.10761300  | -0.30103800 |
| H | 0.70692300  | 1.26645300  | -0.01108900 |
| O | -1.69145500 | 1.65698800  | 1.97452000  |
| H | -0.60902300 | 2.40222700  | 1.07031300  |
| H | -2.35891300 | 1.44428100  | 1.30594500  |

### 13

|   |             |             |             |
|---|-------------|-------------|-------------|
| C | -0.15297600 | -0.40324500 | 0.50748900  |
| C | -1.54094900 | -0.12573900 | -0.04100200 |
| C | -2.66802300 | -0.64539200 | 0.61527800  |
| C | -1.72096900 | 0.63432300  | -1.20387500 |
| C | -3.94982700 | -0.41420100 | 0.11193300  |
| H | -2.53859000 | -1.23032300 | 1.52685800  |
| C | -3.00527400 | 0.87186400  | -1.70256000 |
| H | -0.84751800 | 1.03792700  | -1.71466200 |
| C | -4.12373300 | 0.34813700  | -1.04821000 |
| H | -4.81773300 | -0.82741000 | 0.63152100  |
| H | -3.13033700 | 1.47150200  | -2.60744500 |
| H | -5.12702700 | 0.53260100  | -1.43956000 |
| C | 2.08246100  | -1.57318900 | -0.42261500 |
| H | 2.15390300  | -1.57161300 | -1.51975200 |
| H | 2.84402500  | -2.24707600 | -0.01124600 |
| C | 2.18890100  | -0.15978200 | 0.13985700  |
| H | 2.44408200  | -0.23642300 | 1.22029500  |
| C | 3.30893200  | 0.69574800  | -0.48739500 |
| O | 4.36092900  | 0.08580000  | -0.80935400 |
| O | 3.09566300  | 1.93127700  | -0.57758200 |
| N | 0.86788100  | 0.41976400  | -0.06830800 |
| S | 0.40457500  | -2.14783600 | 0.07859100  |
| O | -0.26202200 | -0.28131000 | 1.93230500  |
| H | -0.40044000 | 1.61086600  | 2.05615100  |
| H | 0.54519400  | -0.64724000 | 2.32921100  |
| O | -0.42920700 | 2.54699600  | 1.77428300  |
| H | -1.11115800 | 2.52869400  | 1.08460000  |
| H | 0.80307900  | 1.37227300  | 0.29412000  |

### 14

|   |             |             |             |   |             |             |             |
|---|-------------|-------------|-------------|---|-------------|-------------|-------------|
| C | -0.27456600 | 0.42405200  | -0.28545800 | H | -3.54648600 | -2.38703100 | 1.43773700  |
| C | -1.70704200 | -0.07682400 | -0.18570100 | H | -5.43794200 | -1.12130100 | 0.41419800  |
| C | -2.77884400 | 0.74988800  | -0.54974300 | C | 2.00798100  | 0.09151800  | 1.25927800  |
| C | -1.97918500 | -1.35552400 | 0.32291800  | H | 1.89950000  | -0.84411100 | 1.83390200  |
| C | -4.09761800 | 0.30455200  | -0.41208600 | H | 3.01268700  | 0.49160100  | 1.46539100  |
| H | -2.57634700 | 1.74589700  | -0.94267000 | C | 1.96846900  | -0.28378200 | -0.25600600 |
| C | -3.29489500 | -1.80143100 | 0.45754000  | H | 2.34844900  | 0.55330300  | -0.85317800 |
| H | -1.14601600 | -1.99660100 | 0.60948900  | C | 2.85268000  | -1.52886900 | -0.47480800 |
| C | -4.36110300 | -0.97191900 | 0.09131600  | O | 4.08162800  | -1.31686200 | -0.61185100 |
| H | -4.92245500 | 0.96073500  | -0.70083000 | O | 2.27377700  | -2.64633300 | -0.42629300 |
| H | -3.48948200 | -2.80188600 | 0.85185500  | N | 0.59675900  | -0.57547100 | -0.61322400 |
| H | -5.39119300 | -1.32051500 | 0.19792200  | S | 0.70705000  | 1.26742200  | 1.74312700  |
| C | 1.85342200  | 0.10850500  | 1.37575100  | O | -0.23983300 | 1.50673800  | -1.23151400 |
| H | 1.76669700  | -0.78547000 | 2.00902400  | H | 0.64710100  | 1.99001500  | -1.10198200 |
| H | 2.67580400  | 0.73497200  | 1.74336400  | H | 0.33380800  | -1.50498700 | -0.28458500 |
| C | 2.01575900  | -0.26773700 | -0.09058100 | O | 1.80136500  | 2.90925500  | -0.56332500 |
| H | 2.39497200  | 0.62183900  | -0.63603000 | H | 1.52692600  | 2.58921500  | 0.35623700  |
| C | 3.03117200  | -1.39484200 | -0.37099800 | H | 1.42261900  | 3.80129800  | -0.62519700 |
| O | 3.93713600  | -1.57877100 | 0.48129800  |   |             |             |             |
| O | 2.88996800  | -2.00404800 | -1.46261800 |   |             |             |             |
| N | 0.67082600  | -0.63842200 | -0.52793300 |   |             |             |             |
| S | 0.27277800  | 1.05487300  | 1.43719800  |   |             |             |             |
| O | -0.23945700 | 1.46433500  | -1.22715600 |   |             |             |             |
| H | 0.56980300  | 2.01222000  | -1.09581600 |   |             |             |             |
| H | 0.67055800  | -0.88522600 | -1.51760900 |   |             |             |             |
| O | 1.80266300  | 3.13715000  | -0.49930800 |   |             |             |             |
| H | 1.46287500  | 2.85543900  | 0.37484400  |   |             |             |             |
| H | 1.35946400  | 3.98793400  | -0.64863600 |   |             |             |             |

## TS10

imaginary frequency =  $-71.03 \text{ cm}^{-1}$

|   |             |             |             |   |             |             |             |
|---|-------------|-------------|-------------|---|-------------|-------------|-------------|
| C | -0.36411800 | 0.35914000  | -0.58947400 | H | -3.54648600 | -2.38703100 | 1.43773700  |
| C | -1.75583000 | -0.05960400 | -0.30697300 | H | -5.43794200 | -1.12130100 | 0.41419800  |
| C | -2.82501200 | 0.65633600  | -0.87092400 | C | 2.00798100  | 0.09151800  | 1.25927800  |
| C | -2.02887900 | -1.15902000 | 0.52701000  | H | 1.89950000  | -0.84411100 | 1.83390200  |
| C | -4.14224900 | 0.27239200  | -0.61477600 | H | 3.01268700  | 0.49160100  | 1.46539100  |
| H | -2.61727400 | 1.51112400  | -1.51433700 | C | 1.96846900  | -0.28378200 | -0.25600600 |
| C | -3.34557900 | -1.53778800 | 0.78110600  | H | 2.34844900  | 0.55330300  | -0.85317800 |
| H | -1.21450400 | -1.69979800 | 1.01265900  | C | 2.85268000  | -1.52886900 | -0.47480800 |
| C | -4.40658200 | -0.82451600 | 0.21027400  | O | 4.08162800  | -1.31686200 | -0.61185100 |
| H | -4.96578000 | 0.83298600  | -1.06266700 | O | 2.27377700  | -2.64633300 | -0.42629300 |
|   |             |             |             | N | 0.59675900  | -0.57547100 | -0.61322400 |
|   |             |             |             | S | 0.70705000  | 1.26742200  | 1.74312700  |
|   |             |             |             | O | -0.23983300 | 1.50673800  | -1.23151400 |
|   |             |             |             | H | 0.64710100  | 1.99001500  | -1.10198200 |
|   |             |             |             | H | 0.33380800  | -1.50498700 | -0.28458500 |
|   |             |             |             | O | 1.80136500  | 2.90925500  | -0.56332500 |
|   |             |             |             | H | 1.52692600  | 2.58921500  | 0.35623700  |
|   |             |             |             | H | 1.42261900  | 3.80129800  | -0.62519700 |

## 15a

|   |             |             |             |   |             |             |             |
|---|-------------|-------------|-------------|---|-------------|-------------|-------------|
| C | 0.29599100  | -0.40755500 | -0.30612000 | C | 0.29599100  | -0.40755500 | -0.30612000 |
| C | 1.76262600  | -0.16553600 | -0.10072800 | C | 1.76262600  | -0.16553600 | -0.10072800 |
| C | 2.67096600  | -1.03318200 | -0.72629800 | C | 2.67096600  | -1.03318200 | -0.72629800 |
| C | 2.25072200  | 0.91091300  | 0.65687000  | C | 2.25072200  | 0.91091300  | 0.65687000  |
| C | 4.04509900  | -0.84696900 | -0.57228900 | C | 4.04509900  | -0.84696900 | -0.57228900 |
| H | 2.28563000  | -1.85782800 | -1.32846100 | H | 2.28563000  | -1.85782800 | -1.32846100 |
| C | 3.62664900  | 1.10257000  | 0.80152400  | C | 3.62664900  | 1.10257000  | 0.80152400  |
| H | 1.55918600  | 1.62174300  | 1.11400500  | H | 1.55918600  | 1.62174300  | 1.11400500  |
| C | 4.52595300  | 0.22124600  | 0.19313900  | C | 4.52595300  | 0.22124600  | 0.19313900  |
| H | 4.74459500  | -1.53539000 | -1.05210900 | H | 4.74459500  | -1.53539000 | -1.05210900 |
| H | 3.99706400  | 1.94763600  | 1.38625700  | H | 3.99706400  | 1.94763600  | 1.38625700  |
| H | 5.60189000  | 0.37048500  | 0.31063200  | H | 5.60189000  | 0.37048500  | 0.31063200  |
| C | -2.55390400 | 0.83686500  | -0.50221500 | C | -2.55390400 | 0.83686500  | -0.50221500 |
| H | -2.19706600 | 0.52369700  | -1.49291400 | H | -2.19706600 | 0.52369700  | -1.49291400 |
| H | -3.64578000 | 0.74768100  | -0.49880500 | H | -3.64578000 | 0.74768100  | -0.49880500 |
| C | -1.96959600 | -0.07307300 | 0.58168700  | C | -1.96959600 | -0.07307300 | 0.58168700  |
| H | -2.35417500 | 0.26503700  | 1.55749600  | H | -2.35417500 | 0.26503700  | 1.55749600  |
| C | -2.46271600 | -1.55345600 | 0.44063000  | C | -2.46271600 | -1.55345600 | 0.44063000  |
| O | -1.74532400 | -2.44220200 | 0.95574600  | O | -1.74532400 | -2.44220200 | 0.95574600  |
| O | -3.57025300 | -1.71740600 | -0.13090500 | O | -3.57025300 | -1.71740600 | -0.13090500 |
| N | -0.52393000 | 0.01705500  | 0.67283700  | N | -0.52393000 | 0.01705500  | 0.67283700  |

|   |             |             |             |
|---|-------------|-------------|-------------|
| S | -2.07386100 | 2.60347000  | -0.36305900 |
| O | -0.11939100 | -0.98109700 | -1.32448700 |
| H | -2.68915600 | 2.84263600  | 0.82016200  |
| H | -0.12390400 | 0.47409000  | 1.48278100  |

**OH-**

|   |            |            |             |
|---|------------|------------|-------------|
| O | 0.00000000 | 0.00000000 | 0.10808500  |
| H | 0.00000000 | 0.00000000 | -0.86467800 |

**TS11**

imaginary frequency = -314.81 cm<sup>-1</sup>

|   |             |             |             |
|---|-------------|-------------|-------------|
| C | -0.12350100 | -0.26882400 | 0.23717900  |
| C | -1.55334200 | 0.12207400  | 0.07583100  |
| C | -2.57122600 | -0.84222500 | -0.02237600 |
| C | -1.90500900 | 1.47701200  | -0.01405400 |
| C | -3.90071100 | -0.46255300 | -0.20325500 |
| H | -2.31286000 | -1.89745800 | 0.07542100  |
| C | -3.23903600 | 1.86072100  | -0.18954000 |
| H | -1.11689800 | 2.22765200  | 0.05175900  |
| C | -4.24279600 | 0.89369000  | -0.28522800 |
| H | -4.67786400 | -1.22780900 | -0.27474900 |
| H | -3.49239600 | 2.92206500  | -0.25503800 |
| H | -5.28507200 | 1.19120900  | -0.42420800 |
| C | 2.08803500  | -1.05220600 | -0.85314900 |
| H | 2.22278900  | -0.56703200 | -1.83422700 |
| H | 2.85769100  | -1.82463700 | -0.73020000 |
| C | 2.12692000  | -0.00490900 | 0.28583800  |
| H | 2.33750800  | -0.55950400 | 1.22532300  |
| C | 3.31603000  | 0.95181800  | 0.06104900  |
| O | 4.45026300  | 0.39226300  | 0.05635200  |
| O | 3.10038500  | 2.17584200  | -0.11791900 |
| N | 0.81977900  | 0.60500900  | 0.37988200  |
| S | 0.41674300  | -1.78051900 | -0.75489000 |
| O | -0.42079800 | -1.31629600 | 1.98828200  |
| H | 0.04976600  | -2.07330900 | 1.61747600  |

**16**

|   |            |             |             |
|---|------------|-------------|-------------|
| C | 0.38476500 | 0.34049000  | 0.32780000  |
| C | 1.83735300 | 0.04766900  | 0.13142700  |
| C | 2.80652600 | 1.03551800  | 0.37108300  |
| C | 2.25888000 | -1.22603200 | -0.28996600 |

|   |             |             |             |
|---|-------------|-------------|-------------|
| C | 4.16444600  | 0.75880300  | 0.18826500  |
| H | 2.48656900  | 2.02510200  | 0.69909900  |
| C | 3.61354300  | -1.50190800 | -0.47258200 |
| H | 1.50473400  | -1.99351600 | -0.46562200 |
| C | 4.57273200  | -0.50978200 | -0.23328500 |
| H | 4.90675800  | 1.53857500  | 0.37578900  |
| H | 3.92573300  | -2.49739500 | -0.79806200 |
| H | 5.63434700  | -0.72699500 | -0.37444900 |
| C | -2.63700000 | 0.66609500  | -0.71604900 |
| H | -2.47331100 | 0.33097600  | -1.75749100 |
| H | -3.71380900 | 0.54978100  | -0.51331100 |
| C | -1.89595300 | -0.30991100 | 0.21935900  |
| H | -2.00729500 | 0.10371300  | 1.24098100  |
| C | -2.65208400 | -1.66825600 | 0.22297100  |
| O | -3.78506000 | -1.64492500 | 0.78453400  |
| O | -2.13862600 | -2.67160300 | -0.33392900 |
| N | -0.49286400 | -0.48003200 | -0.11651800 |
| S | -2.15623500 | 2.43677500  | -0.51281700 |
| O | 0.13709100  | 1.48209300  | 0.99494300  |
| H | -0.74041800 | 1.92094300  | 0.55524400  |

**17**

|   |             |             |             |
|---|-------------|-------------|-------------|
| C | 0.42391900  | 0.29282500  | 0.75668300  |
| C | 1.82501400  | 0.01521100  | 0.27615000  |
| C | 2.84246400  | 0.89177600  | 0.68266600  |
| C | 2.15723300  | -1.08723300 | -0.52836800 |
| C | 4.16177400  | 0.68753000  | 0.27552900  |
| H | 2.58201200  | 1.73747100  | 1.32105700  |
| C | 3.47876400  | -1.29682400 | -0.92872800 |
| H | 1.39393100  | -1.80830600 | -0.82877100 |
| C | 4.48312600  | -0.40737500 | -0.53353900 |
| H | 4.94246200  | 1.38349000  | 0.59154100  |
| H | 3.72536900  | -2.16241300 | -1.54794900 |
| H | 5.51583100  | -0.57152200 | -0.85035400 |
| C | -2.68736000 | 0.74785900  | -0.74050100 |
| H | -2.58654400 | 0.23262400  | -1.71970300 |
| H | -3.76384400 | 0.68327200  | -0.49133400 |
| C | -1.98030700 | -0.16581500 | 0.29591400  |
| H | -2.12125400 | 0.26739200  | 1.29468700  |
| C | -2.62438900 | -1.56954600 | 0.23628800  |
| O | -3.74134900 | -1.69802200 | 0.80282200  |



|   |             |             |             |
|---|-------------|-------------|-------------|
| O | -2.02347000 | -2.45520300 | -0.43339000 |
| N | -0.55837000 | -0.27443100 | 0.04538800  |
| S | -2.10732500 | 2.47639600  | -0.82266400 |
| O | 0.23733200  | 1.00006200  | 1.76182700  |
| H | -0.32369700 | -0.88848300 | -0.72689500 |

|   |             |             |             |
|---|-------------|-------------|-------------|
| N | -0.41475700 | -0.49068100 | 1.17462200  |
| H | -0.79772400 | -0.12591200 | 2.05262400  |
| S | -2.17635700 | -2.42796800 | -1.96506700 |
| H | -3.10513200 | -2.90060300 | -1.09924500 |
| H | 0.32699400  | -1.15012700 | 1.42453500  |

## TS12

imaginary frequency = -231.14 cm<sup>-1</sup>

|   |             |             |             |
|---|-------------|-------------|-------------|
| C | 0.55347600  | 1.04495800  | 0.43750200  |
| S | 1.40547500  | 1.69163200  | 1.77244800  |
| C | -0.64225300 | 1.75597500  | -0.13574100 |
| C | -0.93507400 | 1.70260900  | -1.50714300 |
| C | -1.51871400 | 2.44495400  | 0.71859700  |
| C | -2.07496900 | 2.33612800  | -2.01311900 |
| H | -0.27107200 | 1.16325000  | -2.18143100 |
| C | -2.66036900 | 3.06604400  | 0.21464000  |
| H | -1.28370200 | 2.48811000  | 1.78329400  |
| C | -2.94282500 | 3.01613500  | -1.15619400 |
| H | -2.28586300 | 2.29058400  | -3.08427900 |
| H | -3.33380100 | 3.59438700  | 0.89374800  |
| H | -3.83584800 | 3.50590100  | -1.55162300 |
| O | 1.24321400  | 0.41858400  | -0.59297500 |
| C | 2.53809300  | -0.04193100 | -0.41613400 |
| C | 3.60639700  | 0.82169200  | -0.67021300 |
| C | 2.76030800  | -1.37910600 | -0.08187800 |
| C | 4.91375200  | 0.33985700  | -0.57867000 |
| H | 3.40007900  | 1.85983500  | -0.93302500 |
| C | 4.07369400  | -1.85225100 | 0.00969200  |
| H | 1.91476500  | -2.04502200 | 0.09457200  |
| C | 5.15150200  | -0.99647500 | -0.23545100 |
| H | 5.75182300  | 1.01240100  | -0.77655000 |
| H | 4.25130300  | -2.89861200 | 0.26889200  |
| H | 6.17549700  | -1.37023100 | -0.16513300 |
| C | -0.96707200 | -2.06467100 | -0.63918100 |
| H | -0.60039500 | -3.00482200 | -0.19984600 |
| H | -0.12372900 | -1.57906100 | -1.14676500 |
| C | -1.50974100 | -1.13765600 | 0.44383100  |
| H | -2.08400300 | -0.33149400 | -0.04365200 |
| C | -2.49840500 | -1.79497800 | 1.45558000  |
| O | -3.17008900 | -2.78262100 | 1.06600100  |
| O | -2.56670000 | -1.24348300 | 2.58281400  |

## 18

|   |             |             |             |
|---|-------------|-------------|-------------|
| C | -0.26720100 | -0.73200600 | 0.57410200  |
| S | -1.14917300 | -1.49543600 | 1.91318600  |
| C | 0.73514200  | -1.65472100 | -0.11345600 |
| C | 0.63418700  | -1.95987300 | -1.47686000 |
| C | 1.77963300  | -2.22869700 | 0.63207800  |
| C | 1.54922500  | -2.83084400 | -2.08145100 |
| H | -0.16553400 | -1.51486400 | -2.06741900 |
| C | 2.69943900  | -3.08292900 | 0.02588300  |
| H | 1.85918700  | -2.01722700 | 1.69919300  |
| C | 2.58688300  | -3.39218600 | -1.33607200 |
| H | 1.44834800  | -3.06353200 | -3.14450100 |
| H | 3.50664700  | -3.51710500 | 0.62089200  |
| H | 3.30430800  | -4.06745400 | -1.80840000 |
| O | -1.05661500 | -0.11472500 | -0.46167200 |
| C | -2.41135300 | 0.07604700  | -0.30059600 |
| C | -3.29254300 | -0.85404600 | -0.85925900 |
| C | -2.90211400 | 1.22132800  | 0.33455100  |
| C | -4.67066500 | -0.63449700 | -0.78684500 |
| H | -2.88527900 | -1.74416500 | -1.34187800 |
| C | -4.28166700 | 1.43361100  | 0.40711800  |
| H | -2.20366700 | 1.93821700  | 0.76963800  |
| C | -5.16969000 | 0.50823200  | -0.15176900 |
| H | -5.35811100 | -1.36176900 | -1.22585800 |
| H | -4.66356400 | 2.32885300  | 0.90390700  |
| H | -6.24725800 | 0.67876900  | -0.09526100 |
| C | 0.75952400  | 2.59671700  | -0.13061200 |
| H | 0.78623900  | 3.28752300  | 0.72615500  |
| H | -0.29144300 | 2.42974000  | -0.40006000 |
| C | 1.40456700  | 1.26280100  | 0.23471100  |
| H | 1.54488200  | 0.66634600  | -0.67796500 |
| C | 2.79544100  | 1.37517700  | 0.92984900  |
| O | 3.64029500  | 2.13904600  | 0.41289800  |
| O | 2.95364200  | 0.65661200  | 1.95254000  |
| N | 0.53434700  | 0.46632400  | 1.15149300  |

|   |             |            |             |
|---|-------------|------------|-------------|
| H | 1.20277200  | 0.12774500 | 1.87656700  |
| S | 1.51236800  | 3.38190100 | -1.60420900 |
| H | 2.77409800  | 3.26098200 | -1.12103500 |
| H | -0.15460300 | 1.04807900 | 1.64358000  |

|   |             |             |             |
|---|-------------|-------------|-------------|
| H | -0.95668500 | -1.37156500 | 1.04929000  |
| S | -4.63852800 | 0.67945300  | -1.13556300 |
| H | -4.91910800 | 0.74922800  | 0.18950000  |
| H | -1.35537300 | -2.01199800 | -0.44964500 |

### TS13

imaginary frequency = -257.95 cm<sup>-1</sup>

|   |             |             |             |
|---|-------------|-------------|-------------|
| C | 0.10465500  | -0.55820200 | -0.59542200 |
| S | -0.11769500 | 0.37263000  | -1.99007000 |
| C | 1.28574700  | -1.46442300 | -0.45135700 |
| C | 2.48940000  | -1.11553700 | -1.09103100 |
| C | 1.26792100  | -2.62172300 | 0.35092800  |
| C | 3.63689600  | -1.89214700 | -0.93330300 |
| H | 2.50283700  | -0.22611000 | -1.72051200 |
| C | 2.41520700  | -3.40545100 | 0.49584500  |
| H | 0.36519900  | -2.93745200 | 0.87573000  |
| C | 3.60600700  | -3.04342800 | -0.14027400 |
| H | 4.56110300  | -1.59636500 | -1.43551000 |
| H | 2.37485100  | -4.30493300 | 1.11458100  |
| H | 4.50236700  | -3.65633000 | -0.02046000 |
| O | 0.40230700  | 0.48082400  | 0.93781700  |
| C | 1.27335400  | 1.46080700  | 0.72825200  |
| C | 2.63446500  | 1.30495500  | 1.08569800  |
| C | 0.87611100  | 2.67455300  | 0.11985500  |
| C | 3.55247600  | 2.33085800  | 0.86244700  |
| H | 2.94344300  | 0.36607500  | 1.55004700  |
| C | 1.80453800  | 3.69459100  | -0.10534700 |
| H | -0.17324200 | 2.80312200  | -0.14758400 |
| C | 3.14506600  | 3.52960900  | 0.26027900  |
| H | 4.59707300  | 2.19547200  | 1.15603600  |
| H | 1.47728000  | 4.62903400  | -0.56973600 |
| H | 3.86709500  | 4.33083000  | 0.08502300  |
| C | -3.36600200 | -0.61754200 | -0.91176800 |
| H | -3.84066800 | -1.58529900 | -0.68706000 |
| H | -2.85934900 | -0.69694500 | -1.88348800 |
| C | -2.33114100 | -0.26422500 | 0.15205200  |
| H | -1.98976700 | 0.76758800  | 0.00350400  |
| C | -2.82556500 | -0.42332600 | 1.61946700  |
| O | -3.91808900 | 0.10096400  | 1.92440000  |
| O | -2.05454900 | -1.06551500 | 2.38405900  |
| N | -1.12137800 | -1.13629900 | 0.03604100  |

### 19

|   |             |             |             |
|---|-------------|-------------|-------------|
| C | 0.16317400  | -0.68630600 | -0.72860200 |
| S | -0.03066300 | 0.48775700  | -1.86891600 |
| C | 1.38976700  | -1.47196800 | -0.51929300 |
| C | 2.59988400  | -1.02115600 | -1.08615600 |
| C | 1.41538400  | -2.65144800 | 0.25697600  |
| C | 3.78920200  | -1.71866100 | -0.88363300 |
| H | 2.58783000  | -0.11336100 | -1.68856800 |
| C | 2.60682700  | -3.34960900 | 0.44936100  |
| H | 0.51142900  | -3.04478500 | 0.72364600  |
| C | 3.80008000  | -2.88783700 | -0.11665000 |
| H | 4.71472000  | -1.34545100 | -1.32812000 |
| H | 2.60197200  | -4.26245100 | 1.04925700  |
| H | 4.73169100  | -3.43615500 | 0.04058100  |
| O | 0.50381900  | 0.40723100  | 1.27369900  |
| C | 1.15228000  | 1.47399700  | 0.93519700  |
| C | 2.57882800  | 1.54749900  | 1.02215500  |
| C | 0.48652000  | 2.62084500  | 0.39985000  |
| C | 3.27250400  | 2.68923200  | 0.63247400  |
| H | 3.10831800  | 0.67833400  | 1.42061600  |
| C | 1.19604000  | 3.76131500  | 0.01620400  |
| H | -0.60364800 | 2.59802200  | 0.33873500  |
| C | 2.59024300  | 3.80765400  | 0.12441800  |
| H | 4.36270800  | 2.71486500  | 0.72309400  |
| H | 0.65190600  | 4.62644800  | -0.37473100 |
| H | 3.14115600  | 4.70167900  | -0.17745500 |
| C | -3.26827200 | -0.72537200 | -0.99410400 |
| H | -3.73507600 | -1.70643500 | -0.81628600 |
| H | -2.75685400 | -0.76118500 | -1.96604400 |
| C | -2.25063500 | -0.40688200 | 0.09621700  |
| H | -1.92543600 | 0.63685500  | 0.00572600  |
| C | -2.75107700 | -0.64287500 | 1.55104200  |
| O | -3.86413200 | -0.17207800 | 1.86586200  |
| O | -1.95956200 | -1.28321000 | 2.29565800  |
| N | -1.02432100 | -1.24995400 | -0.04370700 |
| H | -0.82490800 | -1.46118500 | 0.97026600  |

|   |             |             |             |
|---|-------------|-------------|-------------|
| S | -4.55261700 | 0.56637000  | -1.17420400 |
| H | -4.86187800 | 0.56151800  | 0.14592800  |
| H | -1.26669000 | -2.14918700 | -0.48524700 |

|   |             |             |             |
|---|-------------|-------------|-------------|
| S | -4.58992800 | 0.19869200  | -1.53613300 |
| H | -5.05849000 | 0.55348800  | -0.31466700 |
| H | -1.31233700 | -1.85225300 | 0.45387500  |

### TS14

imaginary frequency = -37.07 cm<sup>-1</sup>

|   |             |             |             |
|---|-------------|-------------|-------------|
| C | 0.05576300  | -0.64094900 | -0.53176800 |
| S | -0.00244700 | 0.52618500  | -1.68097200 |
| C | 1.13726500  | -1.61895000 | -0.34892000 |
| C | 2.27471500  | -1.55554600 | -1.18038600 |
| C | 1.10787200  | -2.60129000 | 0.66621900  |
| C | 3.33732500  | -2.44037700 | -1.00928500 |
| H | 2.30912200  | -0.79788600 | -1.96318500 |
| C | 2.17007600  | -3.48779200 | 0.82885800  |
| H | 0.27051100  | -2.67347700 | 1.36082800  |
| C | 3.29107100  | -3.41317600 | -0.00595400 |
| H | 4.20759600  | -2.36941600 | -1.66563400 |
| H | 2.12570300  | -4.23874400 | 1.62069600  |
| H | 4.12311800  | -4.10827100 | 0.12688500  |
| O | 0.94165800  | 0.50339700  | 1.46130600  |
| C | 1.61676200  | 1.45125800  | 0.90795100  |
| C | 3.03009700  | 1.34413400  | 0.69279300  |
| C | 0.99046100  | 2.64305700  | 0.41840400  |
| C | 3.75129500  | 2.36111100  | 0.07577500  |
| H | 3.52803100  | 0.43560900  | 1.04296100  |
| C | 1.73089300  | 3.65929400  | -0.18977900 |
| H | -0.08506400 | 2.75147000  | 0.57827500  |
| C | 3.11275400  | 3.53164800  | -0.36963100 |
| H | 4.83075800  | 2.24683600  | -0.06409600 |
| H | 1.21960200  | 4.56391900  | -0.53312100 |
| H | 3.68719300  | 4.32827500  | -0.84831800 |
| C | -3.25945000 | -0.84626600 | -0.84038900 |
| H | -3.68639100 | -1.75051100 | -0.38045500 |
| H | -2.65626800 | -1.16084600 | -1.70460500 |
| C | -2.37530900 | -0.10703500 | 0.15573600  |
| H | -2.09391300 | 0.87278200  | -0.25547100 |
| C | -2.98270400 | 0.12583600  | 1.56909900  |
| O | -4.19955600 | 0.40273600  | 1.64189600  |
| O | -2.16206800 | 0.04802000  | 2.52063600  |
| N | -1.09960100 | -0.84818300 | 0.38000400  |
| H | -0.80756400 | -0.52470300 | 1.33666000  |

### 20a

|   |             |             |             |
|---|-------------|-------------|-------------|
| C | 0.68984900  | -0.61953900 | -0.19306100 |
| S | 0.30902600  | -2.23524000 | -0.47409500 |
| C | 2.10044100  | -0.16717500 | 0.00453300  |
| C | 3.15741900  | -0.84913300 | -0.62230000 |
| C | 2.39849300  | 0.94279400  | 0.81688200  |
| C | 4.47524500  | -0.42518400 | -0.45437200 |
| H | 2.92482400  | -1.71440900 | -1.24468200 |
| C | 3.72024300  | 1.35704800  | 0.99533300  |
| H | 1.59929000  | 1.47478200  | 1.33632000  |
| C | 4.76218500  | 0.67797800  | 0.35767600  |
| H | 5.28396100  | -0.95870100 | -0.95925800 |
| H | 3.93549700  | 2.21158900  | 1.64092900  |
| H | 5.79547000  | 1.00532900  | 0.49476700  |
| C | -2.29602400 | -0.39149700 | 0.97917100  |
| H | -2.27915400 | 0.35513200  | 1.78803200  |
| H | -1.70283500 | -1.25950900 | 1.29831200  |
| C | -1.65888700 | 0.19938300  | -0.29205800 |
| H | -1.85427800 | -0.49384300 | -1.12600700 |
| C | -2.24537300 | 1.59747500  | -0.63277400 |
| O | -3.46597500 | 1.64288900  | -0.93171300 |
| O | -1.45915200 | 2.57616200  | -0.56564200 |
| N | -0.22700000 | 0.34769500  | -0.12919200 |
| H | 0.05042700  | 1.33147100  | -0.08518700 |
| S | -3.99723100 | -1.02318400 | 0.72320400  |
| H | -4.37345700 | 0.06374200  | 0.00002900  |

### TS15

imaginary frequency = -1291.83 cm<sup>-1</sup>

|   |             |            |             |
|---|-------------|------------|-------------|
| C | 0.23576200  | 0.33953400 | 0.83888700  |
| S | 1.04432100  | 0.68685200 | 2.45812700  |
| C | 0.09347300  | 1.58305200 | -0.03791500 |
| C | 0.30093200  | 1.51846300 | -1.42306100 |
| C | -0.35254000 | 2.78847700 | 0.52454900  |
| C | 0.08690100  | 2.64288700 | -2.22699600 |
| H | 0.63447500  | 0.58727900 | -1.88042900 |
| C | -0.57060100 | 3.90910400 | -0.27830800 |

|   |             |             |             |
|---|-------------|-------------|-------------|
| H | -0.51746500 | 2.84278800  | 1.60165400  |
| C | -0.34771200 | 3.84202800  | -1.65813300 |
| H | 0.26126000  | 2.57648300  | -3.30353100 |
| H | -0.91480300 | 4.84103800  | 0.17651900  |
| H | -0.51414200 | 4.72075300  | -2.28567800 |
| O | 0.86748300  | -0.72956500 | 0.12965800  |
| C | 2.19990400  | -0.76265700 | -0.17020200 |
| C | 3.07032000  | 0.33500000  | -0.10678800 |
| C | 2.67750200  | -2.00918800 | -0.60246800 |
| C | 4.40945000  | 0.16829700  | -0.47518200 |
| H | 2.71774700  | 1.30586900  | 0.23092800  |
| C | 4.01451900  | -2.15896000 | -0.97099800 |
| H | 1.98213800  | -2.85022300 | -0.64415700 |
| C | 4.89165200  | -1.07011500 | -0.90738500 |
| H | 5.08191200  | 1.02821100  | -0.42182400 |
| H | 4.37248500  | -3.13542400 | -1.30650300 |
| H | 5.93952000  | -1.18637200 | -1.19245500 |
| C | -2.00605500 | -2.17703700 | -0.11082200 |
| H | -2.67230200 | -2.57435300 | 0.67048100  |
| H | -1.00507400 | -2.59367300 | 0.06311000  |
| C | -1.93037100 | -0.64865200 | -0.02928300 |
| H | -1.48389600 | -0.27534700 | -0.96364800 |
| C | -3.31916500 | 0.04508100  | 0.09161800  |
| O | -4.22174700 | -0.32518300 | -0.69980800 |
| O | -3.42275300 | 0.94591700  | 0.96450000  |
| N | -1.10705400 | -0.23801100 | 1.12572100  |
| H | -1.66691900 | 0.49060200  | 1.59223300  |
| S | -2.51744900 | -2.80648600 | -1.75480000 |
| H | 0.43113600  | -0.75868400 | 2.97458200  |
| H | -3.59223400 | -1.98103000 | -1.81301800 |
| O | -0.31312400 | -1.73265600 | 2.95781100  |
| H | -0.83018000 | -1.20333100 | 2.09064100  |
| H | -0.90691800 | -1.59435700 | 3.71544200  |

## 21

|   |             |            |             |
|---|-------------|------------|-------------|
| C | 0.21495900  | 0.26081200 | 0.83315000  |
| S | 0.99775100  | 0.58029400 | 2.49959800  |
| C | 0.16869200  | 1.55853500 | 0.02430600  |
| C | 0.41863500  | 1.55160800 | -1.35534900 |
| C | -0.26150200 | 2.74822800 | 0.63093300  |
| C | 0.26570500  | 2.71883100 | -2.10916600 |

|   |             |             |             |
|---|-------------|-------------|-------------|
| H | 0.73294900  | 0.63175500  | -1.84778400 |
| C | -0.41097100 | 3.91421200  | -0.12242300 |
| H | -0.48420900 | 2.76334400  | 1.69910400  |
| C | -0.14464300 | 3.90470600  | -1.49532900 |
| H | 0.46799700  | 2.69689900  | -3.18247700 |
| H | -0.74067700 | 4.83375500  | 0.36659800  |
| H | -0.26100700 | 4.81745300  | -2.08420800 |
| O | 0.87507900  | -0.78392000 | 0.14280300  |
| C | 2.21261200  | -0.79896500 | -0.15871700 |
| C | 3.08876600  | 0.28677600  | -0.02652900 |
| C | 2.68351600  | -2.02338400 | -0.65532400 |
| C | 4.43073200  | 0.12969500  | -0.39047200 |
| H | 2.74562800  | 1.24698500  | 0.34910000  |
| C | 4.02239600  | -2.16293900 | -1.01892800 |
| H | 1.98209700  | -2.85486000 | -0.74945100 |
| C | 4.90676700  | -1.08597900 | -0.88648700 |
| H | 5.10814500  | 0.98041900  | -0.28356900 |
| H | 4.37625200  | -3.12168000 | -1.40551200 |
| H | 5.95629000  | -1.19437300 | -1.16824000 |
| C | -2.04624400 | -2.04571800 | -0.35026700 |
| H | -2.68190100 | -2.54232100 | 0.39858000  |
| H | -1.03977800 | -2.47571300 | -0.26628300 |
| C | -1.96557500 | -0.53890200 | -0.07675800 |
| H | -1.55692300 | -0.05445800 | -0.98027900 |
| C | -3.35099600 | 0.13260000  | 0.16219000  |
| O | -4.30213100 | -0.20516400 | -0.58695500 |
| O | -3.40594800 | 0.99235300  | 1.07993500  |
| N | -1.11656200 | -0.27211800 | 1.09315900  |
| H | -1.63583100 | 0.42297200  | 1.64192900  |
| S | -2.61530300 | -2.46585300 | -2.04257400 |
| H | 0.64894300  | -0.64902500 | 2.96095800  |
| H | -3.70650900 | -1.66621900 | -1.94465700 |
| O | -0.61781200 | -2.40483500 | 2.83266700  |
| H | -0.86420700 | -1.72111600 | 2.15429600  |
| H | -1.14109300 | -2.12820400 | 3.60080900  |

## TS16

imaginary frequency = -268.21 cm<sup>-1</sup>

|   |             |             |             |
|---|-------------|-------------|-------------|
| C | 0.07656600  | -0.75442900 | 0.64500700  |
| S | -0.64361400 | -1.80446000 | 1.91919000  |
| C | 1.35106700  | -1.23154800 | -0.00142900 |

|   |             |             |             |
|---|-------------|-------------|-------------|
| C | 1.64147300  | -0.95112700 | -1.34516900 |
| C | 2.30497900  | -1.90895500 | 0.77398800  |
| C | 2.86105200  | -1.34238700 | -1.90025700 |
| H | 0.90248300  | -0.43686200 | -1.95510200 |
| C | 3.52440400  | -2.29681400 | 0.21702900  |
| H | 2.09211300  | -2.12383400 | 1.82140500  |
| C | 3.80722400  | -2.01501500 | -1.12270600 |
| H | 3.07042200  | -1.11878700 | -2.94880100 |
| H | 4.25716400  | -2.82038900 | 0.83526100  |
| H | 4.76110900  | -2.32040400 | -1.55908800 |
| O | -1.05767500 | -1.07679700 | -0.81422500 |
| C | -2.29332800 | -0.59638200 | -0.63349200 |
| C | -3.35117600 | -1.44739500 | -0.24372700 |
| C | -2.56600200 | 0.77638300  | -0.81948600 |
| C | -4.63769700 | -0.93974900 | -0.05996500 |
| H | -3.14382900 | -2.50994400 | -0.10434000 |
| C | -3.85583300 | 1.27713800  | -0.62312800 |
| H | -1.76017900 | 1.43523300  | -1.14611800 |
| C | -4.89752800 | 0.42513600  | -0.24089000 |
| H | -5.44687400 | -1.61481100 | 0.23147500  |
| H | -4.04826800 | 2.34221300  | -0.77781100 |
| H | -5.90556800 | 0.81886300  | -0.09131200 |
| C | 0.02768400  | 2.95494100  | 0.74320100  |
| H | 0.39411800  | 3.16331700  | 1.76008100  |
| H | -1.06865100 | 2.87235700  | 0.78788100  |
| C | 0.62678400  | 1.63343400  | 0.24387000  |
| H | 0.41974100  | 1.54053800  | -0.83165200 |
| C | 2.17324300  | 1.67340600  | 0.43567900  |
| O | 2.64325500  | 1.28560700  | 1.52798600  |
| O | 2.81520000  | 2.16873900  | -0.53062500 |
| N | -0.02394800 | 0.54989900  | 0.97767300  |
| H | -0.87360900 | 0.80819200  | 1.47569000  |
| S | 0.36648700  | 4.36948900  | -0.37056000 |
| H | -0.69749600 | -2.89750700 | 1.10487600  |
| H | 1.62978100  | 3.97260100  | -0.67104100 |
| O | -0.67312400 | -3.74692000 | -0.72060600 |
| H | -0.85382100 | -2.78861900 | -0.89794100 |
| H | 0.29433200  | -3.79676700 | -0.76663600 |

## TS17

imaginary frequency = -217.45 cm<sup>-1</sup>

|   |             |             |             |
|---|-------------|-------------|-------------|
| C | 0.71326000  | -0.88520400 | 0.36970200  |
| S | 0.44704400  | -2.49211500 | 0.07448600  |
| C | 2.02633300  | -0.24978100 | 0.13067700  |
| C | 3.21091900  | -1.01114200 | 0.03385800  |
| C | 2.10602000  | 1.15020000  | -0.02808000 |
| C | 4.43364600  | -0.39292200 | -0.20760100 |
| H | 3.15376700  | -2.09299500 | 0.16236200  |
| C | 3.33130600  | 1.76330100  | -0.29078200 |
| H | 1.19012000  | 1.73762600  | 0.02266900  |
| C | 4.49796200  | 0.99734300  | -0.37456000 |
| H | 5.34443800  | -0.99332600 | -0.26379600 |
| H | 3.37589200  | 2.84582600  | -0.43056600 |
| H | 5.45860900  | 1.48073000  | -0.56783200 |
| C | -2.59882200 | -0.81673400 | 0.31707700  |
| H | -2.92938600 | -0.69309000 | 1.35890500  |
| H | -2.22111300 | -1.84047200 | 0.19362400  |
| C | -1.49389300 | 0.18649000  | 0.00043500  |
| H | -1.17615300 | 0.06964300  | -1.04545900 |
| C | -1.93555800 | 1.67011900  | 0.17765100  |
| O | -2.89835800 | 1.90608800  | 0.95254500  |
| O | -1.26065100 | 2.53079500  | -0.44637600 |
| N | -0.29213900 | 0.00527300  | 0.84339700  |
| H | -0.56014000 | -0.24106200 | 1.79780900  |
| S | -4.05057000 | -0.68466600 | -0.79729800 |
| H | -4.40962200 | 0.55361700  | -0.38613100 |

## 20b

|   |             |             |             |
|---|-------------|-------------|-------------|
| C | -0.91935500 | 1.33466000  | -0.13474300 |
| S | -1.72916800 | 2.78861600  | -0.37626200 |
| C | -1.69007600 | 0.06327400  | -0.02144100 |
| C | -2.65867000 | -0.25493600 | -0.98835900 |
| C | -1.50918900 | -0.79575000 | 1.07733200  |
| C | -3.41924400 | -1.41834400 | -0.86910700 |
| H | -2.80796900 | 0.42162600  | -1.83140400 |
| C | -2.28956600 | -1.94772700 | 1.20385700  |
| H | -0.75638300 | -0.55498200 | 1.82960500  |
| C | -3.24076000 | -2.26615800 | 0.23030100  |
| H | -4.15955200 | -1.66238200 | -1.63458000 |
| H | -2.14966700 | -2.60065600 | 2.06863500  |
| H | -3.84414800 | -3.17172300 | 0.32810600  |
| C | 2.16312100  | 0.14641300  | -1.25888900 |

|   |            |             |             |
|---|------------|-------------|-------------|
| H | 2.83694300 | 1.01481300  | -1.27760500 |
| H | 1.50592000 | 0.20020100  | -2.13904400 |
| C | 1.31816300 | 0.14812200  | 0.01449900  |
| H | 0.71396700 | -0.76523200 | 0.03696400  |
| C | 2.14937500 | 0.19260000  | 1.33797000  |
| O | 3.39006500 | 0.36004200  | 1.24560700  |
| O | 1.49106400 | 0.06948100  | 2.40153000  |
| N | 0.41290700 | 1.29670300  | -0.00355600 |
| H | 0.87061900 | 2.20690900  | -0.04486300 |
| S | 3.13763400 | -1.39006400 | -1.47775900 |
| H | 3.89265700 | -1.19143700 | -0.37220600 |

### TS18a

imaginary frequency = -271.19 cm<sup>-1</sup>

|   |             |             |             |
|---|-------------|-------------|-------------|
| C | 0.62173900  | 1.14364800  | -0.05486000 |
| S | 0.23753400  | 1.92524400  | 1.52291400  |
| C | 1.72822600  | 0.09198400  | 0.00868300  |
| C | 1.83537100  | -0.74713800 | 1.12754900  |
| C | 2.56109000  | -0.15104700 | -1.09603000 |
| C | 2.75593400  | -1.79730700 | 1.14607700  |
| H | 1.18956300  | -0.56120900 | 1.98614600  |
| C | 3.49162200  | -1.19319000 | -1.07188600 |
| H | 2.48318200  | 0.47703000  | -1.98435500 |
| C | 3.59211500  | -2.02320500 | 0.04838800  |
| H | 2.82140600  | -2.44202600 | 2.02605100  |
| H | 4.13839000  | -1.35839900 | -1.93716600 |
| H | 4.31654100  | -2.84099100 | 0.06508300  |
| C | -2.85520200 | -0.06013300 | -0.61179800 |
| H | -2.92932700 | -0.39629700 | -1.65851800 |
| H | -3.10905100 | 1.00850900  | -0.58192100 |
| C | -1.41674800 | -0.24523900 | -0.10300900 |
| H | -1.39638900 | 0.00521000  | 0.96479300  |
| C | -0.97681100 | -1.72134600 | -0.29362400 |
| O | -0.37810100 | -2.00432700 | -1.36324800 |
| O | -1.29213700 | -2.53827700 | 0.61606400  |
| N | -0.53616700 | 0.68805800  | -0.80746100 |
| H | -0.19108200 | 0.17209000  | -1.62330200 |
| S | -4.12401700 | -0.91539200 | 0.41138300  |
| H | -3.32143500 | -1.96961100 | 0.70962600  |
| O | 1.15394600  | 2.22744400  | -1.02680100 |
| H | 0.40466400  | 3.07310600  | -0.95178400 |

|   |             |            |             |
|---|-------------|------------|-------------|
| H | 1.98436600  | 2.57548200 | -0.64737100 |
| O | -0.50286700 | 3.93317400 | -0.54894400 |
| H | -0.02709800 | 4.76166300 | -0.36269600 |
| H | -0.54610500 | 3.46206900 | 0.35249500  |

### 22a

|   |             |             |             |
|---|-------------|-------------|-------------|
| C | -0.70444000 | -0.45600800 | 0.03359000  |
| S | -0.47516600 | -0.56885100 | 2.00572200  |
| C | -2.17214100 | -0.13645100 | -0.18728900 |
| C | -2.68886500 | 1.11781200  | 0.17750500  |
| C | -3.03087800 | -1.08712400 | -0.75048600 |
| C | -4.03551700 | 1.41608400  | -0.02847500 |
| H | -2.04208900 | 1.86236200  | 0.64761900  |
| C | -4.38337800 | -0.78872000 | -0.95224600 |
| H | -2.63733600 | -2.06324900 | -1.03187300 |
| C | -4.89006900 | 0.46229900  | -0.59512100 |
| H | -4.42244500 | 2.39581700  | 0.26155900  |
| H | -5.04150300 | -1.54145500 | -1.39315500 |
| H | -5.94596900 | 0.69463200  | -0.75258600 |
| C | 2.33504600  | -0.08465900 | -1.34255700 |
| H | 2.48747200  | 0.63706500  | -2.15906200 |
| H | 1.76654800  | -0.93218400 | -1.74631600 |
| C | 1.54102500  | 0.54843500  | -0.18874700 |
| H | 1.73051800  | -0.05601600 | 0.71476400  |
| C | 2.03767300  | 1.97346700  | 0.17196700  |
| O | 3.28065100  | 2.12559600  | 0.30613900  |
| O | 1.16302200  | 2.86174900  | 0.33046400  |
| N | 0.11695500  | 0.58044800  | -0.48447800 |
| H | -0.21983200 | 1.51117700  | -0.23185900 |
| S | 3.95065000  | -0.77956900 | -0.81296100 |
| H | 4.25705400  | 0.33329300  | -0.09366300 |
| O | -0.39547000 | -1.70717000 | -0.48221600 |
| H | 0.44260500  | -2.05579100 | -0.08000400 |
| H | -1.38648400 | -1.55906800 | 2.14194300  |
| O | 1.76829300  | -2.67591100 | 0.82982800  |
| H | 1.44410900  | -2.16374600 | 1.59549700  |
| H | 2.55822200  | -2.17617500 | 0.53174200  |

### TS19a

imaginary frequency = -188.18 cm<sup>-1</sup>

|   |             |             |             |
|---|-------------|-------------|-------------|
| C | -0.70132000 | -0.42975600 | -0.13543700 |
|---|-------------|-------------|-------------|

|   |             |             |             |
|---|-------------|-------------|-------------|
| S | -0.69766300 | -0.66717500 | 2.23012200  |
| C | -2.14081700 | -0.06491700 | -0.32997100 |
| C | -3.03992700 | -1.03053400 | -0.80311700 |
| C | -2.61095000 | 1.23214100  | -0.06093500 |
| C | -4.38412300 | -0.70583200 | -1.00825300 |
| H | -2.68171800 | -2.03857300 | -1.01034200 |
| C | -3.95125600 | 1.55330100  | -0.26776300 |
| H | -1.94044900 | 1.99406900  | 0.34192600  |
| C | -4.84479700 | 0.58578400  | -0.74397000 |
| H | -5.07266800 | -1.46869500 | -1.37934800 |
| H | -4.30310200 | 2.56440100  | -0.05043000 |
| H | -5.89530200 | 0.83952600  | -0.90370000 |
| C | 2.34465600  | -0.00240100 | -1.46861000 |
| H | 2.36099700  | 0.83474400  | -2.18339600 |
| H | 1.78172600  | -0.82460400 | -1.93164800 |
| C | 1.63052500  | 0.41435100  | -0.17555800 |
| H | 1.82119100  | -0.35935800 | 0.58440700  |
| C | 2.14685800  | 1.74893600  | 0.43572000  |
| O | 3.38916900  | 1.90149800  | 0.53501800  |
| O | 1.26913600  | 2.56967900  | 0.81318700  |
| N | 0.19881400  | 0.55640200  | -0.40092700 |
| H | -0.08247400 | 1.49379500  | -0.10204500 |
| S | 4.04079900  | -0.65082700 | -1.20872400 |
| H | 4.38923600  | 0.39566800  | -0.41724400 |
| O | -0.39376200 | -1.68161000 | -0.52120100 |
| H | 0.40228300  | -2.04740400 | -0.03044700 |
| H | 0.03283400  | 0.46461900  | 2.36244000  |
| O | 1.43117100  | -2.63921600 | 1.11097800  |
| H | 1.15294300  | -3.55560300 | 1.26991500  |
| H | 0.89382300  | -2.10859900 | 1.75754600  |

### TS20a

imaginary frequency = -250.49 cm<sup>-1</sup>

|   |             |             |             |
|---|-------------|-------------|-------------|
| C | -0.63802800 | -0.53636200 | 0.10058000  |
| C | -2.06147600 | -0.11825600 | -0.12188400 |
| C | -3.11453400 | -0.84707600 | 0.46069500  |
| C | -2.38475400 | 0.97773600  | -0.93802600 |
| C | -4.44100200 | -0.48142900 | 0.25135300  |
| H | -2.86139300 | -1.70274200 | 1.08686300  |
| C | -3.71995100 | 1.34317100  | -1.15489100 |
| H | -1.59358600 | 1.54714200  | -1.42812100 |

|   |             |             |             |
|---|-------------|-------------|-------------|
| C | -4.75356200 | 0.61949000  | -0.56064900 |
| H | -5.24220200 | -1.05650100 | 0.72277300  |
| H | -3.94611500 | 2.19694200  | -1.79877200 |
| H | -5.79539000 | 0.90346400  | -0.72803700 |
| C | 2.46867000  | -0.39744200 | -1.10169600 |
| H | 2.55762000  | 0.31438900  | -1.93770400 |
| H | 1.89280000  | -1.26741300 | -1.44508100 |
| C | 1.69477300  | 0.24256600  | 0.05980300  |
| H | 1.78412900  | -0.41371000 | 0.94213900  |
| C | 2.24925500  | 1.63922100  | 0.45456500  |
| O | 3.47522900  | 1.71883400  | 0.73427900  |
| O | 1.43246900  | 2.59634500  | 0.47978800  |
| N | 0.29036700  | 0.38553500  | -0.27945200 |
| H | 0.02048500  | 1.35794500  | -0.11707700 |
| S | 4.12217900  | -1.05307300 | -0.65058000 |
| H | 4.45263700  | 0.06818200  | 0.04102900  |
| S | -0.25348500 | -2.21368400 | 0.14048800  |
| O | -0.72217200 | -0.06838700 | 2.26088600  |
| H | -0.48122300 | -1.00239600 | 2.28090000  |

### 23a

|   |             |             |             |
|---|-------------|-------------|-------------|
| C | -0.64858100 | -0.35040900 | 0.51704900  |
| C | -2.06902900 | -0.01778800 | 0.06697600  |
| C | -3.13872500 | -0.05675800 | 0.97753600  |
| C | -2.35814600 | 0.28076100  | -1.27636400 |
| C | -4.45180200 | 0.17395300  | 0.55973500  |
| H | -2.92722200 | -0.27559400 | 2.02447100  |
| C | -3.67086900 | 0.51115500  | -1.69727100 |
| H | -1.53863700 | 0.32701500  | -1.99305500 |
| C | -4.72852400 | 0.45766600  | -0.78259600 |
| H | -5.26578500 | 0.13637400  | 1.28908500  |
| H | -3.86876000 | 0.73650400  | -2.74897300 |
| H | -5.75516700 | 0.63794300  | -1.11103000 |
| C | 2.37770500  | -0.55136500 | -0.99120700 |
| H | 2.48563900  | 0.00252400  | -1.93765300 |
| H | 1.72043200  | -1.41669000 | -1.15429000 |
| C | 1.69602200  | 0.32171000  | 0.06977400  |
| H | 1.82721000  | -0.18488700 | 1.04515400  |
| C | 2.34868700  | 1.72390400  | 0.23038800  |
| O | 3.60385500  | 1.81431100  | 0.13095200  |
| O | 1.57878000  | 2.68988400  | 0.48002000  |

|   |             |             |             |
|---|-------------|-------------|-------------|
| N | 0.27956100  | 0.47439800  | -0.24378300 |
| H | 0.05886100  | 1.45098600  | -0.03321600 |
| S | 3.99621700  | -1.25997400 | -0.49321900 |
| H | 4.49143300  | -0.05355100 | -0.12291400 |
| S | -0.38828600 | -2.15551900 | 0.35146500  |
| O | -0.52876000 | -0.01868700 | 1.93285600  |
| H | -0.28324100 | -0.87458300 | 2.32225100  |

### TS21a

imaginary frequency = -255.60 cm<sup>-1</sup>

|   |             |             |             |
|---|-------------|-------------|-------------|
| C | -0.67690300 | -0.40997800 | 0.17470800  |
| C | -2.14167500 | -0.00863300 | 0.03732100  |
| C | -3.07183300 | -0.38823200 | 1.01484500  |
| C | -2.59540400 | 0.71564300  | -1.07671900 |
| C | -4.42236300 | -0.05228800 | 0.88597500  |
| H | -2.72266400 | -0.95262500 | 1.87929600  |
| C | -3.94557100 | 1.05265700  | -1.20687600 |
| H | -1.88339500 | 1.01389800  | -1.84596000 |
| C | -4.86671600 | 0.67044600  | -0.22586200 |
| H | -5.13184300 | -0.35625000 | 1.66011900  |
| H | -4.27958700 | 1.61829100  | -2.08063500 |
| H | -5.92238200 | 0.93413900  | -0.32703400 |
| C | 2.39949600  | 0.01896000  | -1.10606500 |
| H | 2.63615600  | 0.76398900  | -1.88133000 |
| H | 1.81644800  | -0.78720200 | -1.56984600 |
| C | 1.56130800  | 0.63980500  | 0.02205600  |
| H | 1.71580000  | 0.02313400  | 0.92483900  |
| C | 2.06606500  | 2.04919600  | 0.42538500  |
| O | 3.31407700  | 2.20947300  | 0.51699800  |
| O | 1.20020500  | 2.92871700  | 0.67252500  |
| N | 0.14831800  | 0.68810900  | -0.32442400 |
| H | -0.20225600 | 1.55466100  | 0.09124500  |
| S | 3.94672400  | -0.77488700 | -0.51958700 |
| H | 4.32896200  | 0.32314300  | 0.17826200  |
| S | -0.46798500 | -1.96682900 | -0.92069000 |
| O | -0.39110000 | -0.75853400 | 1.49295500  |
| H | 0.40735100  | -1.47556900 | 1.49629900  |
| O | 1.37898300  | -2.48557500 | 1.33299700  |
| H | 0.51829100  | -2.45669700 | 0.00751400  |
| H | 2.16533200  | -2.03033000 | 0.99022100  |

### HS-

|   |            |            |             |
|---|------------|------------|-------------|
| S | 0.00000000 | 0.00000000 | 0.08003400  |
| H | 0.00000000 | 0.00000000 | -1.28054900 |

### TS18b

imaginary frequency = -752.13 cm<sup>-1</sup>

|   |             |             |             |
|---|-------------|-------------|-------------|
| C | -0.86207600 | 0.89966500  | -0.25866700 |
| S | -1.73594000 | 2.23767200  | -1.13042000 |
| C | -1.72283700 | -0.32982700 | 0.01907100  |
| C | -2.57827300 | -0.80608000 | -0.98691100 |
| C | -1.63887800 | -1.04296600 | 1.22421600  |
| C | -3.34468200 | -1.95486900 | -0.78828100 |
| H | -2.64294900 | -0.25153600 | -1.92432400 |
| C | -2.41424000 | -2.19086100 | 1.42684700  |
| H | -0.94832800 | -0.71535300 | 2.00070100  |
| C | -3.27057000 | -2.65040700 | 0.42455200  |
| H | -4.00685700 | -2.30751700 | -1.58295000 |
| H | -2.33871100 | -2.73045300 | 2.37409900  |
| H | -3.87574500 | -3.54615600 | 0.58359100  |
| C | 2.29684800  | -0.79988200 | -1.35179600 |
| H | 2.81886600  | 0.09417000  | -1.72412300 |
| H | 1.78244100  | -1.27084900 | -2.20158600 |
| C | 1.28128300  | -0.39558000 | -0.28124900 |
| H | 0.72023800  | -1.28461600 | 0.03330000  |
| C | 2.01669800  | 0.18741600  | 0.95589200  |
| O | 2.67194600  | 1.24677700  | 0.75534900  |
| O | 1.92037500  | -0.43308000 | 2.04531300  |
| N | 0.35301900  | 0.55427200  | -0.90493000 |
| H | 0.84321000  | 1.39661900  | -1.20497400 |
| S | 3.54185100  | -2.02828700 | -0.80229600 |
| H | 4.18525400  | -1.21725300 | 0.07062600  |
| O | -0.48063100 | 1.45866300  | 1.16148600  |
| H | 0.03008400  | 2.57545800  | 0.93603300  |
| H | -1.31662300 | 1.66149600  | 1.61895100  |
| O | 0.30022900  | 3.61588500  | 0.44666000  |
| H | -0.09117400 | 4.30133000  | 1.01769300  |
| H | -0.40040800 | 3.45897100  | -0.31156900 |

### 22b

|   |             |            |             |
|---|-------------|------------|-------------|
| C | -0.78864700 | 1.04597100 | -0.10037900 |
| S | -1.74665800 | 2.35503800 | -1.06205000 |



|   |             |             |             |
|---|-------------|-------------|-------------|
| C | -1.70813500 | -0.16474500 | 0.00785000  |
| C | -2.16739700 | -0.79336000 | -1.15967900 |
| C | -2.06985200 | -0.68463800 | 1.25489700  |
| C | -2.98484400 | -1.92147400 | -1.07748400 |
| H | -1.87814700 | -0.39822100 | -2.13496600 |
| C | -2.89111200 | -1.81408200 | 1.33584800  |
| H | -1.69297100 | -0.21710700 | 2.16399700  |
| C | -3.35068800 | -2.43511600 | 0.17220500  |
| H | -3.33649400 | -2.40366700 | -1.99265200 |
| H | -3.16646000 | -2.21205800 | 2.31539300  |
| H | -3.99071400 | -3.31829200 | 0.23616800  |
| C | 2.35672200  | -0.63685800 | -1.27189400 |
| H | 2.98293300  | 0.26702300  | -1.29708500 |
| H | 1.98013700  | -0.81854700 | -2.28858200 |
| C | 1.19256800  | -0.43637500 | -0.30395400 |
| H | 0.54180100  | -1.31993800 | -0.33794900 |
| C | 1.70797600  | -0.27941900 | 1.15338900  |
| O | 2.58212100  | 0.60937400  | 1.34826200  |
| O | 1.21820100  | -1.04326800 | 2.02414400  |
| N | 0.42482000  | 0.72405300  | -0.78958000 |
| H | 1.02585500  | 1.55162100  | -0.78603600 |
| S | 3.41793700  | -2.07950800 | -0.87886100 |
| H | 3.97250300  | -1.55215600 | 0.23836900  |
| O | -0.47922200 | 1.60155900  | 1.17512000  |
| H | 0.88343700  | 2.90190900  | 0.82923200  |
| H | -1.28666000 | 1.97868900  | 1.56207700  |
| O | 1.46192600  | 3.48428200  | 0.29830800  |
| H | 0.95018000  | 4.30474500  | 0.23169900  |
| H | -0.74336400 | 3.26415500  | -0.98950200 |

### TS19b

imaginary frequency = -170.68 cm<sup>-1</sup>

|   |            |             |             |
|---|------------|-------------|-------------|
| C | 0.83986800 | 1.01084700  | -0.21783800 |
| S | 0.99874000 | 1.76851400  | 1.94526900  |
| C | 1.71878600 | -0.21203000 | -0.22318500 |
| C | 2.74776600 | -0.27958800 | -1.17462300 |
| C | 1.52396000 | -1.30018600 | 0.64139600  |
| C | 3.55946800 | -1.41466700 | -1.26445800 |
| H | 2.90899900 | 0.55968500  | -1.85068400 |
| C | 2.32896800 | -2.43496800 | 0.54529900  |
| H | 0.75757700 | -1.25743500 | 1.41338500  |

|   |             |             |             |
|---|-------------|-------------|-------------|
| C | 3.35082500  | -2.49798600 | -0.40895400 |
| H | 4.35644600  | -1.44884600 | -2.01107500 |
| H | 2.16220300  | -3.27194000 | 1.22719600  |
| H | 3.98411000  | -3.38550700 | -0.47855400 |
| C | -1.88841100 | -0.48032100 | 1.02349900  |
| H | -2.61328800 | 0.32206500  | 1.23098600  |
| H | -1.08378200 | -0.39170800 | 1.76301800  |
| C | -1.32871700 | -0.31185500 | -0.40705500 |
| H | -0.77650900 | -1.22084400 | -0.68129600 |
| C | -2.52344900 | -0.13808900 | -1.38953700 |
| O | -3.14387900 | -1.18521100 | -1.71181200 |
| O | -2.80680500 | 1.03457000  | -1.73709800 |
| N | -0.47194200 | 0.84654900  | -0.55246800 |
| H | -0.99807100 | 1.69175500  | -0.77603700 |
| S | -2.63720400 | -2.12550600 | 1.33329500  |
| H | -3.25089300 | -2.17939700 | 0.12295800  |
| O | 1.43415900  | 2.07826400  | -0.81678500 |
| H | 0.82967400  | 2.86256200  | -0.70156900 |
| H | -0.12251900 | 1.18276900  | 2.41906000  |
| O | -0.31686300 | 3.88369300  | 0.02093800  |
| H | 0.11115200  | 4.75263700  | 0.08020200  |
| H | -0.05333800 | 3.43273800  | 0.86345700  |

### 15b

|   |             |             |             |
|---|-------------|-------------|-------------|
| C | 0.85886700  | -1.28264400 | -1.01857000 |
| C | 1.72942800  | -0.22196000 | -0.41370700 |
| C | 2.68007000  | -0.60238900 | 0.54392300  |
| C | 1.66349500  | 1.11550700  | -0.83096100 |
| C | 3.53927000  | 0.34827300  | 1.09685400  |
| H | 2.72837500  | -1.64546000 | 0.86248700  |
| C | 2.53670900  | 2.06233100  | -0.28947200 |
| H | 0.93667600  | 1.41437500  | -1.58905300 |
| C | 3.47049100  | 1.68239700  | 0.67967900  |
| H | 4.26695200  | 0.04853600  | 1.85455800  |
| H | 2.48700500  | 3.10034800  | -0.62636700 |
| H | 4.14688000  | 2.42564600  | 1.10848000  |
| C | -2.49022600 | 0.34421700  | -0.95833500 |
| H | -3.21500500 | -0.46384300 | -1.13828700 |
| H | -2.20667600 | 0.76992000  | -1.93164600 |
| C | -1.24933400 | -0.18940600 | -0.24997700 |
| H | -0.63068100 | 0.66539300  | 0.05069800  |

|   |             |             |             |
|---|-------------|-------------|-------------|
| C | -1.53120400 | -0.99638500 | 1.05888000  |
| O | -2.70453200 | -1.01405900 | 1.51111300  |
| O | -0.52938700 | -1.55904400 | 1.56674900  |
| N | -0.46510800 | -1.01688200 | -1.16769900 |
| H | -0.97679500 | -1.81370500 | -1.54644000 |
| S | -3.30975100 | 1.71371000  | -0.05650800 |
| H | -3.55060600 | 0.96337900  | 1.04468300  |
| O | 1.35645100  | -2.34257500 | -1.41798300 |

### TS20b

imaginary frequency = -245.82 cm<sup>-1</sup>

|   |             |             |             |
|---|-------------|-------------|-------------|
| C | 0.80284400  | 1.06584400  | -0.49771700 |
| C | 1.70473700  | -0.03279700 | -0.01934900 |
| C | 2.82372300  | 0.25992700  | 0.78342800  |
| C | 1.52542000  | -1.35506200 | -0.45675900 |
| C | 3.72723000  | -0.73629700 | 1.14199700  |
| H | 2.95219900  | 1.28378100  | 1.12994000  |
| C | 2.43866100  | -2.35654100 | -0.09830300 |
| H | 0.66729400  | -1.60971600 | -1.07994400 |
| C | 3.54078700  | -2.05546300 | 0.70142900  |
| H | 4.58535100  | -0.48686600 | 1.77171600  |
| H | 2.28073800  | -3.37842600 | -0.45324100 |
| H | 4.25239000  | -2.83614900 | 0.98147600  |
| C | -2.32310100 | 0.76327300  | 0.70421300  |
| H | -2.95716300 | 1.40228400  | 0.07293900  |
| H | -1.66971800 | 1.39256300  | 1.32587700  |
| C | -1.41420000 | -0.10551600 | -0.16421300 |
| H | -0.84256200 | -0.78142700 | 0.48353600  |
| C | -2.18690400 | -0.97857700 | -1.19909400 |
| O | -3.38566200 | -0.68286600 | -1.44034900 |
| O | -1.54060000 | -1.91399600 | -1.74158900 |
| N | -0.46579200 | 0.74260600  | -0.88712400 |
| H | -0.91047300 | 1.50228200  | -1.39778000 |
| S | -3.38170400 | -0.19732700 | 1.84929600  |
| H | -4.08633000 | -0.81929300 | 0.87533800  |
| O | 0.46033100  | 1.85263300  | 1.53757300  |
| H | 0.53880600  | 2.66908400  | 1.02725400  |
| S | 1.52809600  | 2.42262200  | -1.27092800 |

### 23b

|   |            |            |             |
|---|------------|------------|-------------|
| C | 0.76478700 | 1.20052400 | -0.13083800 |
|---|------------|------------|-------------|

|   |             |             |             |
|---|-------------|-------------|-------------|
| C | 1.70850600  | 0.02912300  | 0.12754400  |
| C | 2.63101000  | 0.07375600  | 1.18754600  |
| C | 1.72579000  | -1.09605200 | -0.71436300 |
| C | 3.54818900  | -0.95992600 | 1.39052700  |
| H | 2.62612400  | 0.93785500  | 1.85228100  |
| C | 2.64178500  | -2.13248300 | -0.51179100 |
| H | 0.99673100  | -1.15984300 | -1.52092300 |
| C | 3.56217300  | -2.07164600 | 0.53980500  |
| H | 4.25624900  | -0.89905800 | 2.22175000  |
| H | 2.63111300  | -2.99857300 | -1.17945500 |
| H | 4.27676300  | -2.88310500 | 0.69896800  |
| C | -2.38548300 | 0.70172600  | 0.75550100  |
| H | -2.95795400 | 1.39319800  | 0.12014100  |
| H | -1.83878800 | 1.28834400  | 1.50268300  |
| C | -1.39942500 | -0.09613500 | -0.10034600 |
| H | -0.83306200 | -0.78097900 | 0.54688400  |
| C | -2.11520200 | -0.95787300 | -1.17409400 |
| O | -3.15774300 | -0.48079600 | -1.70169700 |
| O | -1.57344200 | -2.05297900 | -1.48474800 |
| N | -0.43618100 | 0.75061800  | -0.81267000 |
| H | -0.88626900 | 1.55691700  | -1.24154900 |
| S | -3.56432700 | -0.34073300 | 1.70671600  |
| H | -4.21993400 | -0.82059900 | 0.62445200  |
| O | 0.45571800  | 1.79816100  | 1.16696600  |
| H | 0.55985600  | 2.74518800  | 0.96984100  |
| S | 1.59891500  | 2.47230500  | -1.14218400 |

### TS21b

imaginary frequency = -246.78 cm<sup>-1</sup>

|   |            |             |             |
|---|------------|-------------|-------------|
| C | 0.72794500 | 0.93099000  | -0.10796000 |
| C | 1.76314000 | -0.15885800 | 0.15171200  |
| C | 2.69498300 | -0.00177100 | 1.18952500  |
| C | 1.84311800 | -1.30410700 | -0.65355000 |
| C | 3.68447800 | -0.96111100 | 1.41471800  |
| H | 2.64002600 | 0.88579900  | 1.82000300  |
| C | 2.83271800 | -2.26666600 | -0.42835900 |
| H | 1.10698400 | -1.44966600 | -1.44250400 |
| C | 3.75952400 | -2.09965000 | 0.60457100  |
| H | 4.40082900 | -0.81912400 | 2.22815500  |
| H | 2.87511400 | -3.15594900 | -1.06278200 |
| H | 4.53282100 | -2.85161300 | 0.78034000  |

|   |             |             |             |
|---|-------------|-------------|-------------|
| C | -2.37724300 | 0.34911300  | 0.73418700  |
| H | -2.94856900 | 1.01982800  | 0.07576000  |
| H | -1.85374400 | 0.95994900  | 1.47833800  |
| C | -1.36275100 | -0.44855900 | -0.08722300 |
| H | -0.77766200 | -1.09232400 | 0.58498800  |
| C | -2.03821400 | -1.36455100 | -1.14189800 |
| O | -3.10409000 | -0.94727400 | -1.67221900 |
| O | -1.44326300 | -2.43633200 | -1.43330400 |
| N | -0.42518900 | 0.40686900  | -0.82728700 |
| H | -0.92593000 | 1.17653700  | -1.26656000 |
| S | -3.54962500 | -0.69600900 | 1.68721900  |
| H | -4.17199200 | -1.21509500 | 0.60358200  |
| O | 0.41106600  | 1.56072700  | 1.10060700  |
| H | -0.06682900 | 2.46279600  | 0.82523100  |
| S | 1.52478100  | 2.19953000  | -1.27187500 |
| O | -0.59143500 | 3.66173400  | 0.19356500  |
| H | -1.33774600 | 3.26917600  | -0.28427300 |
| H | 0.55612000  | 3.14545000  | -0.75830000 |

### TS22a

imaginary frequency =  $-51.15 \text{ cm}^{-1}$

|   |             |             |             |
|---|-------------|-------------|-------------|
| C | -0.47168700 | 0.31910000  | -0.51137300 |
| S | -0.19366100 | 1.89758700  | -1.22075700 |
| C | -1.88089100 | -0.02361700 | -0.21704300 |
| C | -2.94588900 | 0.50994100  | -0.96372800 |
| C | -2.15644400 | -0.90137900 | 0.84824500  |
| C | -4.26010300 | 0.15489300  | -0.66090500 |
| H | -2.74943700 | 1.18814500  | -1.79597200 |
| C | -3.47309800 | -1.24519100 | 1.15153600  |
| H | -1.33764900 | -1.27714300 | 1.46452500  |
| C | -4.52739400 | -0.72114300 | 0.39635400  |
| H | -5.07975000 | 0.56433400  | -1.25500800 |
| H | -3.67700700 | -1.91622800 | 1.98860600  |
| H | -5.55868700 | -0.99017700 | 0.63555100  |
| C | 2.15636000  | -0.29790800 | 1.23157900  |
| H | 3.24380500  | -0.12134700 | 1.26322900  |
| H | 1.97011600  | -1.24821700 | 1.76145800  |
| C | 1.83323900  | -0.55628300 | -0.27941000 |
| H | 2.23316300  | 0.26038700  | -0.89057700 |
| C | 2.48542100  | -1.89582400 | -0.68838600 |
| O | 3.70885500  | -1.85213000 | -0.95473600 |

|   |            |             |             |
|---|------------|-------------|-------------|
| O | 1.74455100 | -2.91349200 | -0.64928000 |
| N | 0.40828000 | -0.65317600 | -0.44290800 |
| H | 0.07078000 | -1.58626800 | -0.18627600 |
| S | 1.22192500 | 1.05010000  | 2.00973100  |
| H | 2.20363800 | 2.30574900  | 0.70459500  |
| O | 2.58856100 | 2.75139100  | -0.12172500 |
| H | 3.33847000 | 2.18278800  | -0.35675700 |
| H | 1.13954800 | 2.10551700  | -0.89191100 |

### TS22b

imaginary frequency =  $-836.20 \text{ cm}^{-1}$

|   |             |             |             |
|---|-------------|-------------|-------------|
| C | -0.28744300 | -0.58393300 | -0.71888600 |
| S | -0.39513300 | -2.13508100 | -1.50344700 |
| C | -1.55085500 | 0.07615200  | -0.31311700 |
| C | -2.56459000 | -0.65086900 | 0.33489500  |
| C | -1.78920500 | 1.41673400  | -0.66337600 |
| C | -3.77802500 | -0.04422900 | 0.64768700  |
| H | -2.37685300 | -1.69004100 | 0.60684300  |
| C | -3.00947200 | 2.02158600  | -0.35096000 |
| H | -1.02728200 | 1.98264400  | -1.20116100 |
| C | -4.00479700 | 1.29665300  | 0.30839700  |
| H | -4.55314600 | -0.61656800 | 1.16246400  |
| H | -3.18313400 | 3.06252100  | -0.63324400 |
| H | -4.95780200 | 1.77087200  | 0.55428400  |
| C | 1.81924500  | 0.21275200  | 1.43468500  |
| H | 2.78110400  | -0.24911100 | 1.15308500  |
| H | 2.03069100  | 0.94446500  | 2.22989100  |
| C | 1.31718500  | 1.03204000  | 0.20535000  |
| H | 0.50857000  | 1.69692200  | 0.52444300  |
| C | 2.49743200  | 1.85893900  | -0.34775200 |
| O | 2.73220500  | 2.94474000  | 0.23471600  |
| O | 3.15907000  | 1.33694200  | -1.28360600 |
| N | 0.84489800  | 0.11161000  | -0.80733800 |
| H | 1.62596900  | -0.32096000 | -1.30329400 |
| S | 0.63985600  | -1.05304400 | 1.99280600  |
| H | 0.92600900  | -2.61249600 | -0.83807600 |
| O | 1.89917300  | -2.88646600 | 0.02168200  |
| H | 1.50073600  | -2.34397800 | 0.82461800  |
| H | 2.67485400  | -2.37221300 | -0.26208700 |

### 24b

|   |             |             |             |
|---|-------------|-------------|-------------|
| C | 0.05470400  | 0.62071400  | -0.14448100 |
| S | 0.19734500  | 2.39908500  | -0.60610500 |
| C | 1.46286300  | 0.03436500  | -0.14932200 |
| C | 2.45570100  | 0.54949400  | 0.70228400  |
| C | 1.78637700  | -1.03156700 | -0.99655700 |
| C | 3.74148900  | 0.01108000  | 0.70177300  |
| H | 2.21175000  | 1.37222000  | 1.37717200  |
| C | 3.07478900  | -1.58074900 | -0.98908700 |
| H | 1.01888900  | -1.42256200 | -1.66420400 |
| C | 4.05629300  | -1.06094200 | -0.14401100 |
| H | 4.50197600  | 0.42456600  | 1.36869900  |
| H | 3.30824800  | -2.41746400 | -1.65213000 |
| H | 5.06254200  | -1.48670300 | -0.13929900 |
| C | -1.18149300 | -1.21015100 | 1.13382400  |
| H | -1.98110600 | -1.56636400 | 1.79460800  |
| H | -0.32560500 | -1.89867500 | 1.20006500  |
| C | -1.68726100 | -1.06189300 | -0.30688600 |
| H | -1.63926900 | -2.05240300 | -0.79211900 |
| C | -3.18237400 | -0.62339700 | -0.33005300 |
| O | -3.98648800 | -1.35914300 | 0.29134900  |
| O | -3.46303800 | 0.42021400  | -0.97742600 |
| N | -0.86109700 | -0.07743400 | -1.01874400 |
| H | -1.54548900 | 0.58996300  | -1.38481600 |
| S | -0.65820600 | 0.47185800  | 1.60560500  |
| H | -1.10081300 | 2.69409500  | -0.34505200 |

## 25a

|   |             |             |             |
|---|-------------|-------------|-------------|
| C | 0.69238800  | 0.67586400  | 0.26604400  |
| S | 0.43784000  | 2.33176400  | 0.46900900  |
| C | 2.06163400  | 0.12709700  | 0.01841800  |
| C | 3.19345800  | 0.76505100  | 0.55461300  |
| C | 2.24686600  | -1.02547400 | -0.76755500 |
| C | 4.47219800  | 0.25802300  | 0.32503600  |
| H | 3.04853000  | 1.66657700  | 1.15166800  |
| C | 3.52895000  | -1.52566400 | -1.00678900 |
| H | 1.38961400  | -1.52451500 | -1.22387200 |
| C | 4.64582100  | -0.88860200 | -0.45880900 |
| H | 5.33975400  | 0.76146000  | 0.75827100  |
| H | 3.65382300  | -2.41312200 | -1.63157400 |
| H | 5.64839600  | -1.28108100 | -0.64453200 |
| C | -2.22931600 | 0.22787300  | -1.12465400 |

|   |             |             |             |
|---|-------------|-------------|-------------|
| H | -1.96092700 | -0.69236100 | -1.68155800 |
| H | -1.59970300 | 1.03280200  | -1.54968600 |
| C | -1.72185800 | 0.00974200  | 0.32024600  |
| H | -1.92256500 | 0.91100900  | 0.91137100  |
| C | -2.37570800 | -1.22554900 | 0.97887900  |
| O | -3.20170900 | -1.04720500 | 1.90594800  |
| O | -1.99150100 | -2.34338000 | 0.52644600  |
| N | -0.28120500 | -0.23292900 | 0.30954100  |
| H | -0.04976300 | -1.21613000 | 0.17003200  |
| S | -4.00781700 | 0.61326000  | -1.25142200 |

## TS23a

imaginary frequency = -154.50 cm<sup>-1</sup>

|   |             |             |             |
|---|-------------|-------------|-------------|
| C | -0.20503300 | 0.71176100  | -0.22770900 |
| S | -0.13221300 | 2.39059400  | -0.74013400 |
| C | -1.56060800 | 0.02565700  | -0.18564900 |
| C | -2.72939000 | 0.70283100  | -0.56024600 |
| C | -1.68444800 | -1.31573600 | 0.22698600  |
| C | -3.97784600 | 0.07135000  | -0.52905400 |
| H | -2.61984600 | 1.74235100  | -0.87651100 |
| C | -2.92477100 | -1.95358500 | 0.25071900  |
| H | -0.80367700 | -1.85896500 | 0.57434800  |
| C | -4.08319700 | -1.26233300 | -0.12800900 |
| H | -4.87223100 | 0.62638800  | -0.82534800 |
| H | -2.99091000 | -2.99413100 | 0.57931100  |
| H | -5.05603200 | -1.75971200 | -0.10261300 |
| C | 2.01878100  | -0.01192500 | 1.40254700  |
| H | 2.85211600  | 0.53835100  | 1.86779100  |
| H | 2.13810500  | -1.07830800 | 1.66346800  |
| C | 2.11379800  | 0.12312500  | -0.15205400 |
| H | 2.39163500  | 1.15526500  | -0.40087000 |
| C | 3.18420300  | -0.85229500 | -0.66334300 |
| O | 4.37261600  | -0.43551700 | -0.66669000 |
| O | 2.80276500  | -2.01484400 | -0.97279000 |
| N | 0.81025500  | -0.14287500 | -0.71693400 |
| H | 0.60274200  | -1.13032100 | -0.57056900 |
| S | 0.40560800  | 0.60496700  | 1.96639900  |

## 26a

|   |             |            |             |
|---|-------------|------------|-------------|
| C | -0.18906000 | 0.70968200 | -0.13956900 |
| S | -0.14510200 | 2.39116400 | -0.75247200 |

|   |             |             |             |
|---|-------------|-------------|-------------|
| C | -1.55400700 | 0.01610500  | -0.13567600 |
| C | -2.71157400 | 0.67716000  | -0.56418800 |
| C | -1.68282400 | -1.31572800 | 0.30322800  |
| C | -3.95712100 | 0.03821500  | -0.56139400 |
| H | -2.58937000 | 1.71009200  | -0.89888300 |
| C | -2.91960500 | -1.96231300 | 0.29894900  |
| H | -0.80859200 | -1.84625800 | 0.68663000  |
| C | -4.06817800 | -1.28684600 | -0.13393300 |
| H | -4.84483700 | 0.58052300  | -0.89889100 |
| H | -2.99083400 | -2.99641400 | 0.64651000  |
| H | -5.03839400 | -1.79011400 | -0.13101000 |
| C | 2.02873300  | 0.06315100  | 1.38125500  |
| H | 2.83167900  | 0.66221500  | 1.83699100  |
| H | 2.15175600  | -0.98137200 | 1.71449100  |
| C | 2.11979000  | 0.11679700  | -0.17325100 |
| H | 2.41047200  | 1.13275100  | -0.47142700 |
| C | 3.18219000  | -0.89303600 | -0.63402600 |
| O | 4.37440300  | -0.48756800 | -0.64993600 |
| O | 2.79210500  | -2.06465300 | -0.89299900 |
| N | 0.80762200  | -0.15590100 | -0.72115900 |
| H | 0.60681700  | -1.13815400 | -0.52818500 |
| S | 0.38234100  | 0.68362900  | 1.85165900  |

## TS24

imaginary frequency = -338.06 cm<sup>-1</sup>

|   |             |             |             |
|---|-------------|-------------|-------------|
| C | 0.67866900  | -0.91156000 | 0.32913600  |
| S | 0.44242400  | -2.51637100 | -0.01983200 |
| C | 1.98955900  | -0.25605900 | 0.11001900  |
| C | 3.19434600  | -0.98871200 | 0.08280300  |
| C | 2.04223400  | 1.13913500  | -0.09408600 |
| C | 4.41170100  | -0.34653200 | -0.12875100 |
| H | 3.15683000  | -2.06739400 | 0.24275400  |
| C | 3.26097200  | 1.77530300  | -0.33105000 |
| H | 1.11019200  | 1.70390100  | -0.09737800 |
| C | 4.44966000  | 1.03820800  | -0.33969300 |
| H | 5.33843500  | -0.92508700 | -0.12764900 |
| H | 3.28387400  | 2.85331200  | -0.50737600 |
| H | 5.40527800  | 1.54007800  | -0.50952700 |
| C | -2.71332400 | -0.81459200 | 0.35181000  |
| H | -2.96785800 | -0.62271400 | 1.41519600  |
| H | -2.32866700 | -1.84849400 | 0.31007000  |

|   |             |             |             |
|---|-------------|-------------|-------------|
| C | -1.56940400 | 0.12714900  | -0.00191900 |
| H | -1.28747500 | -0.02482500 | -1.05278700 |
| C | -1.93231700 | 1.62163000  | 0.18085500  |
| O | -2.44195900 | 1.95971500  | 1.28378000  |
| O | -1.60016400 | 2.41759700  | -0.74383500 |
| N | -0.32651500 | -0.04526400 | 0.81362900  |
| H | -0.57793000 | -0.27834300 | 1.77557000  |
| S | -4.15384000 | -0.56712200 | -0.75633000 |

## 25b

|   |             |             |             |
|---|-------------|-------------|-------------|
| C | -0.87932700 | 1.33216600  | -0.04365200 |
| S | -1.66040400 | 2.82945100  | -0.09921300 |
| C | -1.68501600 | 0.07611500  | -0.02557600 |
| C | -2.74982000 | -0.08098300 | -0.92990000 |
| C | -1.44258900 | -0.93537500 | 0.92164500  |
| C | -3.54141000 | -1.22916200 | -0.90208900 |
| H | -2.94864300 | 0.71276300  | -1.65166900 |
| C | -2.24983400 | -2.07523800 | 0.95851800  |
| H | -0.62130900 | -0.83691900 | 1.63199800  |
| C | -3.29625700 | -2.22995600 | 0.04517900  |
| H | -4.35702100 | -1.34254200 | -1.62025600 |
| H | -2.05472100 | -2.84797500 | 1.70597600  |
| H | -3.92092500 | -3.12603600 | 0.07209800  |
| C | 2.31383500  | 0.24200200  | -1.26066900 |
| H | 2.91257100  | 1.15617800  | -1.07570400 |
| H | 1.70243700  | 0.45542600  | -2.16002000 |
| C | 1.35083300  | 0.08850700  | -0.07903900 |
| H | 0.75060500  | -0.81126600 | -0.23644800 |
| C | 2.10028200  | -0.02408600 | 1.27483200  |
| O | 2.86560700  | 0.93321500  | 1.56522300  |
| O | 1.84149300  | -1.01442500 | 2.00954000  |
| N | 0.45057000  | 1.24837600  | 0.01681500  |
| H | 0.93532200  | 2.14281400  | 0.07913100  |
| S | 3.36457400  | -1.24040900 | -1.47681200 |

## TS23b

imaginary frequency = -147.47 cm<sup>-1</sup>

|   |             |             |             |
|---|-------------|-------------|-------------|
| C | -0.20919900 | -0.86215600 | -0.44560700 |
| S | -0.56649100 | -2.32415100 | -1.33739800 |
| C | -1.39193000 | 0.04808400  | -0.22127500 |
| C | -2.56044800 | -0.43434500 | 0.39881800  |

|   |             |             |             |   |            |             |             |
|---|-------------|-------------|-------------|---|------------|-------------|-------------|
| C | -1.39426800 | 1.37210400  | -0.68716200 | O | 3.54749600 | 2.07828600  | 0.27463200  |
| C | -3.67925900 | 0.37760500  | 0.56049400  | O | 3.66606400 | 0.29718100  | -1.09038100 |
| H | -2.57124300 | -1.46874900 | 0.74669600  | N | 0.97420200 | -0.13794600 | -0.80386100 |
| C | -2.52077700 | 2.19210600  | -0.52820700 | H | 1.61017500 | -0.80849100 | -1.23412900 |
| H | -0.50784600 | 1.76025300  | -1.19033000 | S | 0.32081800 | -1.31121200 | 1.59406000  |
| C | -3.66746900 | 1.70411600  | 0.09835700  |   |            |             |             |
| H | -4.57202000 | -0.02087000 | 1.05033900  |   |            |             |             |
| H | -2.49527600 | 3.21944300  | -0.90213700 |   |            |             |             |
| H | -4.54561300 | 2.34205200  | 0.22534800  |   |            |             |             |
| C | 1.86190500  | -0.33845400 | 1.46447500  |   |            |             |             |
| H | 2.70068200  | -1.03364700 | 1.27919600  |   |            |             |             |
| H | 2.13788500  | 0.29594900  | 2.32196900  |   |            |             |             |
| C | 1.67441000  | 0.55290700  | 0.20641100  |   |            |             |             |
| H | 1.08208200  | 1.43343400  | 0.49427900  |   |            |             |             |
| C | 3.05491300  | 1.02439700  | -0.28825400 |   |            |             |             |
| O | 3.52201000  | 2.05974900  | 0.25458500  |   |            |             |             |
| O | 3.63723500  | 0.30358700  | -1.14288700 |   |            |             |             |
| N | 0.98095100  | -0.20417300 | -0.81350600 |   |            |             |             |
| H | 1.62909200  | -0.86486700 | -1.23976600 |   |            |             |             |
| S | 0.31613900  | -1.23576500 | 1.75409100  |   |            |             |             |

## 26b

|   |             |             |             |
|---|-------------|-------------|-------------|
| C | -0.18941600 | -0.84631100 | -0.34864600 |
| S | -0.56649100 | -2.28118000 | -1.34399700 |
| C | -1.39829200 | 0.05675000  | -0.17355700 |
| C | -2.56145900 | -0.42549500 | 0.45757100  |
| C | -1.41858000 | 1.36883600  | -0.66940400 |
| C | -3.69363400 | 0.37316500  | 0.59524300  |
| H | -2.56321900 | -1.45202300 | 0.82926500  |
| C | -2.55835600 | 2.17545000  | -0.53616000 |
| H | -0.53261800 | 1.75576000  | -1.17378400 |
| C | -3.70072500 | 1.68681500  | 0.09813600  |
| H | -4.58200300 | -0.02664600 | 1.09209900  |
| H | -2.54575200 | 3.19454300  | -0.93299000 |
| H | -4.58882400 | 2.31454700  | 0.20566800  |
| C | 1.86368400  | -0.36207200 | 1.45684700  |
| H | 2.71910400  | -1.03652600 | 1.28065400  |
| H | 2.06614800  | 0.21894800  | 2.36954800  |
| C | 1.69255200  | 0.57471700  | 0.23337700  |
| H | 1.11878900  | 1.45863800  | 0.55052200  |
| C | 3.08107300  | 1.03504700  | -0.25254600 |
